# Supplementary material for: Odorant Receptors Expressing and Antennal Lobes Architecture Are Linked to Caste Dimorphism in Asian Honeybee, Apis cerana (Hymenoptera: Apidae)
Source: MDPI journal article supplement (doi:10.3390/ijms25073934), 2024-04-01
Supplement: s1 [file s1]

**Table S1** Summary of the RNA sequencing results from *A. cerana*.

| Caste  | Sample    | Clean Reads | GC Content | ≥Q30   | Mapped Reads | Mapped Ratio |
|--------|-----------|-------------|------------|--------|--------------|--------------|
| Queen  | Antenna 1 | 25,545,147  | 36.50%     | 94.30% | 22,955,310   | 89.86%       |
|        | Antenna 2 | 27,899,715  | 34.70%     | 96.40% | 23,671,910   | 84.85%       |
|        | Antenna 3 | 19,634,513  | 34.72%     | 91.86% | 15,880,769   | 80.88%       |
|        | Proboscis | 23,798,512  | 37.02%     | 93.53% | 19,980,012   | 83.95%       |
|        | Thorax    | 22,025,773  | 35.47%     | 93.60% | 20,438,429   | 92.97%       |
|        | Abdomen   | 19,485,795  | 37.64%     | 93.69% | 16,618,853   | 85.29%       |
|        | Legs      | 23,100,506  | 40.12%     | 94.01% | 18,879,313   | 81.73%       |
| Drone  | Antenna 1 | 23,278,546  | 38.93%     | 93.59% | 21,461,548   | 92.19%       |
|        | Antenna 2 | 21,368,119  | 38.74%     | 92.07% | 18,632,085   | 87.20%       |
|        | Antenna 3 | 20,957,969  | 38.76%     | 93.00% | 18,558,356   | 88.55%       |
|        | Proboscis | 24,332,414  | 40.10%     | 93.27% | 21,568,689   | 88.64%       |
|        | Thorax    | 24,353,115  | 34.73%     | 92.95% | 18,504,552   | 75.98%       |
|        | Abdomen   | 23,359,124  | 39.26%     | 93.03% | 19,277,682   | 82.53%       |
|        | Legs      | 20,763,665  | 40.05%     | 92.20% | 18,643,566   | 89.79%       |
| Worker | Antenna 1 | 20,877,517  | 38.31%     | 93.42% | 19,167,456   | 91.81%       |
|        | Antenna 2 | 28,843,136  | 38.16%     | 94.47% | 26,165,052   | 90.72%       |
|        | Antenna 3 | 23,367,640  | 38.95%     | 95.68% | 21,798,828   | 93.29%       |
|        | Proboscis | 22,785,896  | 38.90%     | 92.04% | 19,367,362   | 85.00%       |
|        | Thorax    | 20,544,123  | 35.23%     | 92.92% | 15,349,843   | 74.72%       |
|        | Abdomen   | 19,655,062  | 37.15%     | 92.30% | 16,249,932   | 82.68%       |
|        | Legs      | 21,908,379  | 41.54%     | 92.64% | 18,866,613   | 86.12%       |

Note: Clean Reads: counts of clean pair-end reads; GC Content: percentage of G, C in clean data; ≥Q30: percentage of bases with Q-score no less than Q30; Mapped Reads: counts of clean reads mapped to genome; Mapped Ratio: counts of mapped to the reference genome reads and the proportion of that in clean data.

**Table S2** Summary of assembly results.

| Length Range | Transcript      | Unigene        |
|--------------|-----------------|----------------|
| 200-300      | 35,746(11.62%)  | 32,336(38.66%) |
| 300-500      | 28,087(9.13%)   | 21,442(25.64%) |
| 500-1000     | 32,054(10.42%)  | 15,200(18.17%) |
| 1000-2000    | 45,639(14.84%)  | 7,361(8.80%)   |
| 2000+        | 166,089(53.99%) | 7,293(8.72%)   |
| Total Number | 307,615         | 83,632         |
| Total Length | 885,506,748     | 66,221,764     |
| N50 Length   | 4,692           | 1,576          |
| Mean Length  | 2878.62         | 791.82         |

**Table S3** The average FPKM value of all genes expressed in antennae. Data showed in the table indicate the mean  $\pm$  SEM. Lower case alphabets indicate the significant differences calculated by one-way ANOVA followed by Tukey's multiple comparison test ( $p < 0.05$ ).

| Sample | Log <sub>10</sub> (FPKM) |
|--------|--------------------------|
| QA     | 1.84348 $\pm$ 0.01464 a  |
| DA     | 1.77613 $\pm$ 0.00725 b  |
| WA     | 1.74258 $\pm$ 0.00772 b  |

QA: Queen antenna; DA: Drone antenna; WA: Worker antenna.

**Table S4** GO enrichment results on olfactory related genes (“odorant binding” categories).

| Groups   | DEGs                | Odorant binding |             |             |             |             |             |             |
|----------|---------------------|-----------------|-------------|-------------|-------------|-------------|-------------|-------------|
| QA vs DA | Upregulated genes   | APICC_00740     | APICC_01795 | APICC_06104 | APICC_07395 | APICC_09105 | APICC_01038 | APICC_05964 |
|          |                     | APICC_00976     | APICC_04484 | APICC_06720 | APICC_08050 | APICC_09654 | APICC_09844 | APICC_09870 |
|          |                     | APICC_01037     | APICC_04782 | APICC_07022 | APICC_08110 | APICC_09659 | APICC_07149 | APICC_08685 |
|          |                     | APICC_09673     |             |             |             |             |             |             |
|          | Downregulated genes | APICC_02313     | APICC_02322 | APICC_02327 | APICC_02330 | APICC_03357 | APICC_08009 | APICC_09008 |
|          |                     | APICC_02320     | APICC_02325 | APICC_02328 | APICC_02331 | APICC_06988 | APICC_08361 | APICC_09701 |
| WA vs DA | Upregulated genes   | APICC_03149     |             |             |             |             |             |             |
|          |                     | APICC_00582     | APICC_01795 | APICC_05964 | APICC_07022 | APICC_07149 | APICC_08685 | APICC_08209 |
|          |                     | APICC_0103      | APICC_04484 | APICC_06720 | APICC_07108 | APICC_07395 | APICC_09654 | APICC_09673 |
|          |                     | APICC_01038     | APICC_05244 | APICC_06806 | APICC_07148 | APICC_08110 | APICC_09659 | APICC_09690 |
|          | Downregulated genes | APICC_09788     | APICC_09844 | APICC_09870 |             |             |             |             |
|          |                     | APICC_10028     |             |             |             |             |             |             |
| WA vs QA | Upregulated genes   | APICC_01916     | APICC_02325 | APICC_02328 | APICC_03149 | APICC_06988 | APICC_07721 | APICC_02391 |
|          |                     | APICC_02320     | APICC_0232  |             |             |             |             |             |
|          |                     | APICC_00024     | APICC_02318 | APICC_02325 | APICC_03357 | APICC_05244 | APICC_06806 | APICC_06988 |
|          | Downregulated genes | APICC_02313     | APICC_02322 | APICC_02330 | APICC_03890 | APICC_05246 | APICC_06987 | APICC_07148 |
|          |                     | APICC_07318     | APICC_08009 | APICC_09788 | APICC_09701 | APICC_09654 |             |             |
|          |                     | APICC_00740     | APICC_01038 | APICC_07022 | APICC_08050 | APICC_09105 | APICC_09844 | APICC_09870 |
|          |                     | APICC_01037     | APICC_06720 | APICC_07721 |             |             |             |             |

**Table S5** Detailed information on identified AcerORs.

| Gene       | Full-length | ORF (aa) | TMD | BLASTX best hit                                               |             |         |          |                |
|------------|-------------|----------|-----|---------------------------------------------------------------|-------------|---------|----------|----------------|
|            |             |          |     | Description                                                   | Query cover | E-value | Identity | Accession      |
| AcerOR85b  | Yes         | 411      | 8   | odorant receptor 13a-like [Apis dorsata]                      | 99%         | 0.0     | 92.65%   | XP_031371304.1 |
| AcerOR91b  | Yes         | 411      | 8   | odorant receptor 13a-like [Apis laboriosa]                    | 99%         | 0.0     | 86.34%   | XP_043793992.1 |
| AcerOR117  | Yes         | 399      | 8   | odorant receptor 13a [Apis mellifera]                         | 100%        | 0.0     | 95.50%   | XP_026300764.1 |
| AcerOR171  | Yes         | 395      | 8   | odorant receptor 24a isoform X1 [Bombus terrestris]           | 100%        | 3e-163  | 58.25%   | XP_033183372.1 |
| AcerOR2    | Yes         | 478      | 7   | odorant receptor coreceptor [Apis cerana]                     | 100%        | 0.0     | 100.00%  | NP_001315406.1 |
| AcerOR141b | Yes         | 432      | 7   | odorant receptor 141 [Apis cerana cerana]                     | 100%        | 0.0     | 99.77%   | ALR87041.1     |
| AcerOR141a | Yes         | 432      | 7   | odorant receptor 13a isoform X1 [Apis cerana]                 | 98%         | 0.0     | 98.35%   | XP_016916748.1 |
| AcerOR88   | Yes         | 431      | 7   | odorant receptor 13a-like [Apis cerana]                       | 93%         | 0.0     | 97.03%   | XP_016904169.1 |
| AcerOR34   | Yes         | 426      | 7   | odorant receptor 46a-like [Apis laboriosa]                    | 91%         | 0.0     | 93.09%   | XP_043803265.1 |
| AcerOR87   | Yes         | 414      | 7   | odorant receptor Or2-like [Apis cerana]                       | 100%        | 0.0     | 99.52%   | XP_016904173.1 |
| AcerOR91a  | Yes         | 412      | 7   | odorant receptor 13a-like [Apis laboriosa]                    | 94%         | 0.0     | 87.44%   | XP_043793992.1 |
| AcerOR85a  | Yes         | 402      | 7   | odorant receptor 13a-like [Apis dorsata]                      | 96%         | 0.0     | 92.51%   | XP_031371304.1 |
| AcerOR121  | Yes         | 398      | 7   | odorant receptor 30a-like [Apis cerana]                       | 100%        | 0.0     | 99.75%   | XP_016921242.1 |
| AcerOR174  | Yes         | 393      | 7   | odorant receptor 4-like isoform X1 [Apis mellifera caucasica] | 85%         | 0.0     | 93.77%   | KAG6798728.1   |
| AcerOR172  | Yes         | 393      | 7   | odorant receptor 4-like isoform X1 [Apis mellifera caucasica] | 85%         | 0.0     | 91.69%   | KAG6798728.1   |
| AcerOR159  | Yes         | 392      | 7   | odorant receptor 13a-like [Temnothorax curvispinosus]         | 100%        | 2e-31   | 26.57%   | XP_039311370.1 |
| AcerOR155  | Yes         | 392      | 7   | odorant receptor 85b-like [Bombus affinis]                    | 90%         | 2e-158  | 62.04%   | XP_003402379.2 |
| AcerOR160b | Yes         | 390      | 7   | odorant receptor 9a-like [Apis cerana]                        | 100%        | 0.0     | 99.49%   | XP_016918120.1 |
| AcerOR160a | Yes         | 389      | 7   | odorant receptor 82a-like isoform X1 [Apis dorsata]           | 98%         | 0.0     | 98.69%   | XP_006625152.1 |
| AcerOR106  | Yes         | 388      | 7   | odorant receptor 22c-like [Apis cerana]                       | 100%        | 0.0     | 99.23%   | XP_016908637.1 |
| AcerOR71b  | Yes         | 379      | 7   | odorant receptor Or1-like isoform X3 [Apis cerana]            | 99%         | 0.0     | 99.47%   | XP_016905289.1 |
| AcerOR149b | Yes         | 377      | 7   | odorant receptor 43a-like isoform X2 [Apis mellifera]         | 98%         | 0.0     | 70.78%   | XP_026294950.1 |

| Gene       | Full-length | ORF (aa) | TMD | BLASTX best hit                                                        |             |         |          |                |
|------------|-------------|----------|-----|------------------------------------------------------------------------|-------------|---------|----------|----------------|
|            |             |          |     | Description                                                            | Query cover | E-value | Identity | Accession      |
| AcerOR149a | Yes         | 371      | 7   | odorant receptor 43a-like isoform X2 [Apis mellifera]                  | 95%         | 0.0     | 70.06%   | XP_026294950.1 |
| AcerOR156  | Yes         | 365      | 7   | odorant receptor 67a-like [Apis cerana]                                | 96%         | 0.0     | 100.00%  | XP_016922948.1 |
| AcerOR151  | Yes         | 336      | 7   | odorant receptor 49a-like [Apis cerana]                                | 92%         | 0.0     | 98.06%   | XP_016913160.1 |
| AcerOR19   | Yes         | 464      | 6   | Odorant receptor 43a [Apis cerana cerana]                              | 99%         | 0.0     | 68.98%   | PBC34545.1     |
| AcerOR166b | Yes         | 436      | 6   | odorant receptor 167 [Apis cerana cerana]                              | 100%        | 0.0     | 99.77%   | ALR81939.1     |
| AcerOR23   | Yes         | 433      | 6   | odorant receptor 85b-like [Apis mellifera]                             | 100%        | 0.0     | 91.01%   | XP_006565947.2 |
| AcerOR69   | Yes         | 426      | 6   | odorant receptor 46a-like [Apis dorsata]                               | 84%         | 0.0     | 93.48%   | XP_031370968.1 |
| AcerOR166a | Yes         | 425      | 6   | odorant receptor 167 [Apis cerana cerana]                              | 98%         | 0.0     | 99.76%   | ALR81939.1     |
| AcerOR97   | Yes         | 424      | 6   | odorant receptor 9a-like isoform X2 [Bombus vancouverensis nearcticus] | 89%         | 4e-163  | 55.87%   | XP_033189868.1 |
| AcerOR109a | Yes         | 421      | 6   | odorant receptor 109 [Apis mellifera]                                  | 99%         | 0.0     | 89.02%   | NP_001229917.2 |
| AcerOR109b | Yes         | 421      | 6   | odorant receptor 109 [Apis mellifera]                                  | 99%         | 0.0     | 89.26%   | NP_001229917.2 |
| AcerOR35   | Yes         | 413      | 6   | odorant receptor 67a-like isoform X1 [Apis cerana]                     | 100%        | 0.0     | 100.00%  | XP_028521978.1 |
| AcerOR24   | Yes         | 412      | 6   | odorant receptor 22c-like [Apis laboriosa]                             | 100%        | 0.0     | 94.90%   | XP_043803306.1 |
| AcerOR26   | Yes         | 410      | 6   | odorant receptor 4-like [Apis cerana]                                  | 100%        | 0.0     | 99.76%   | XP_016910436.1 |
| AcerOR79b  | Yes         | 407      | 6   | odorant receptor 13a-like [Apis cerana]                                | 100%        | 0.0     | 98.53%   | XP_016904176.1 |
| AcerOR48   | Yes         | 407      | 6   | odorant receptor 4-like [Apis laboriosa]                               | 99%         | 0.0     | 88.18%   | XP_043803278.1 |
| AcerOR44   | Yes         | 406      | 6   | odorant receptor 82a-like [Apis mellifera]                             | 100%        | 0.0     | 86.45%   | XP_003250750.1 |
| AcerOR28a  | Yes         | 405      | 6   | odorant receptor 4 isoform X1 [Apis cerana]                            | 100%        | 0.0     | 99.51%   | XP_016910454.1 |
| AcerOR28b  | Yes         | 405      | 6   | odorant receptor 4 isoform X1 [Apis cerana]                            | 100%        | 0.0     | 99.75%   | XP_016910454.1 |
| AcerOR46   | Yes         | 405      | 6   | odorant receptor 4-like [Apis cerana]                                  | 100%        | 0.0     | 80.25%   | XP_016910420.1 |
| AcerOR79a  | Yes         | 404      | 6   | odorant receptor 13a-like [Apis cerana]                                | 100%        | 0.0     | 93.56%   | XP_016904176.1 |
| AcerOR76   | Yes         | 404      | 6   | odorant receptor 13a-like [Apis dorsata]                               | 100%        | 0.0     | 93.66%   | XP_031371292.1 |
| AcerOR84   | Yes         | 402      | 6   | odorant receptor 13a-like [Apis dorsata]                               | 99%         | 0.0     | 80.68%   | XP_031371304.1 |
| AcerOR96b  | Yes         | 402      | 6   | odorant receptor 96 [Apis cerana cerana]                               | 100%        | 0.0     | 99.75%   | AQY09989.1     |
| AcerOR74   | Yes         | 402      | 6   | Odorant receptor Or2 [Apis cerana cerana]                              | 99%         | 0.0     | 100.00%  | PBC27163.1     |

| Gene            | Full-length | ORF (aa) | TMD | BLASTX best hit                                    |             |         |          |                |
|-----------------|-------------|----------|-----|----------------------------------------------------|-------------|---------|----------|----------------|
|                 |             |          |     | Description                                        | Query cover | E-value | Identity | Accession      |
| AcerOR96a       | Yes         | 402      | 6   | odorant receptor 13a-like [Apis cerana]            | 100%        | 0.0     | 99.75%   | XP_016904190.1 |
| AcerOR1         | Yes         | 400      | 6   | odorant receptor 30a-like [Apis cerana]            | 100%        | 0.0     | 99.75%   | NP_001315407.1 |
| AcerOR62b       | Yes         | 399      | 6   | odorant receptor 63 isoform X1 [Apis mellifera]    | 100%        | 0.0     | 95.99%   | XP_006563549.2 |
| AcerOR169b<br>N | No          | 399      | 6   | odorant receptor 22c-like [Apis cerana]            | 99%         | 0.0     | 77.50%   | XP_016904924.2 |
| AcerOR169a<br>N | No          | 398      | 6   | odorant receptor 22c-like [Apis cerana]            | 100%        | 0.0     | 74.56%   | XP_016904923.1 |
| AcerOR111       | Yes         | 398      | 6   | odorant receptor 22c-like [Apis cerana]            | 100%        | 0.0     | 99.75%   | XP_016908625.1 |
| AcerOR18        | Yes         | 398      | 6   | Odorant receptor 43a [Apis cerana cerana]          | 99%         | 0.0     | 99.75%   | PBC34545.1     |
| AcerOR22        | Yes         | 398      | 6   | odorant receptor 22c-like [Apis cerana]            | 98%         | 0.0     | 86.77%   | XP_016904924.2 |
| AcerOR75N       | No          | 397      | 6   | Odorant receptor Or2 [Apis cerana cerana]          | 100%        | 0.0     | 83.80%   | PBC27163.1     |
| AcerOR12        | Yes         | 396      | 6   | odorant receptor 4-like [Apis dorsata]             | 100%        | 0.0     | 84.60%   | XP_006615207.1 |
| AcerOR170       | Yes         | 396      | 6   | odorant receptor 22c-like [Apis cerana]            | 100%        | 0.0     | 98.99%   | XP_016904923.1 |
| AcerOR168C      | No          | 394      | 6   | odorant receptor 22c-like [Apis cerana]            | 99%         | 0.0     | 98.98%   | XP_016904924.2 |
| AcerOR115       | Yes         | 394      | 6   | odorant receptor 13a-like isoform X2 [Apis cerana] | 82%         | 0.0     | 100.00%  | XP_016916414.1 |
| AcerOR11        | Yes         | 394      | 6   | odorant receptor 4-like [Apis cerana]              | 100%        | 0.0     | 100.00%  | XP_016910326.1 |
| AcerOR120       | Yes         | 394      | 6   | odorant receptor 49b-like [Apis florea]            | 97%         | 0.0     | 95.30%   | XP_031773175.1 |
| AcerOR66b       | Yes         | 393      | 6   | odorant receptor 65a isoform X2 [Apis mellifera]   | 100%        | 0.0     | 85.24%   | XP_394081.6    |
| AcerOR28c       | Yes         | 393      | 6   | odorant receptor 4 isoform X1 [Apis cerana]        | 99%         | 0.0     | 99.74%   | XP_016910454.1 |
| AcerOR107a      | Yes         | 391      | 6   | odorant receptor 67c-like [Apis cerana]            | 100%        | 0.0     | 99.49%   | XP_016908627.1 |
| AcerOR107b      | Yes         | 391      | 6   | odorant receptor 67c-like [Apis cerana]            | 100%        | 0.0     | 98.98%   | XP_016908627.1 |
| AcerOR113       | Yes         | 389      | 6   | odorant receptor 13a [Apis cerana]                 | 100%        | 0.0     | 99.23%   | XP_016908549.1 |
| AcerOR163a      | Yes         | 387      | 6   | odorant receptor 85b-like [Apis cerana]            | 100%        | 0.0     | 98.97%   | XP_028523343.1 |
| AcerOR164b      | Yes         | 387      | 6   | odorant receptor 85b-like [Apis cerana]            | 100%        | 0.0     | 93.80%   | XP_016915037.1 |
| AcerOR164a      | Yes         | 387      | 6   | odorant receptor 85b-like [Apis cerana]            | 100%        | 0.0     | 97.16%   | XP_016915037.1 |
| AcerOR163b      | Yes         | 387      | 6   | odorant receptor 85b-like [Apis cerana]            | 100%        | 0.0     | 92.25%   | XP_028523343.1 |
| AcerOR118       | Yes         | 386      | 6   | odorant receptor 85b-like [Apis florea]            | 91%         | 0.0     | 94.07%   | XP_012346755.2 |

| Gene       | Full-length | ORF (aa) | TMD | BLASTX best hit                                     |             |         |          |                |
|------------|-------------|----------|-----|-----------------------------------------------------|-------------|---------|----------|----------------|
|            |             |          |     | Description                                         | Query cover | E-value | Identity | Accession      |
| AcerOR63   | Yes         | 383      | 6   | Putative odorant receptor 63a [Apis cerana cerana]  | 100%        | 6e-167  | 80.24%   | XP_033189868.1 |
| AcerOR142  | Yes         | 375      | 6   | odorant receptor Or2-like [Apis dorsata]            | 100%        | 0.0     | 86.06%   | XP_031369417.1 |
| AcerOR154c | Yes         | 374      | 6   | Odorant receptor 43a [Apis cerana cerana]           | 100%        | 0.0     | 86.90%   | PBC34862.1     |
| AcerOR154b | Yes         | 374      | 6   | Odorant receptor 43a [Apis cerana cerana]           | 100%        | 0.0     | 78.88%   | PBC34862.1     |
| AcerOR157  | Yes         | 370      | 6   | odorant receptor 4-like [Apis florea]               | 100%        | 0.0     | 86.49%   | XP_031771870.1 |
| AcerOR122  | Yes         | 367      | 6   | odorant receptor 4-like [Cataglyphis hispanica]     | 97%         | 8e-32   | 25.33%   | XP_024883413.1 |
| AcerOR154a | Yes         | 363      | 6   | Odorant receptor 43a [Apis cerana cerana]           | 97%         | 0.0     | 78.75%   | PBC34862.1     |
| AcerOR131N | No          | 361      | 6   | odorant receptor 131 isoform X1 [Apis mellifera]    | 100%        | 0.0     | 75.97%   | XP_026300304.1 |
| AcerOR72   | Yes         | 353      | 6   | odorant receptor Or1-like [Apis cerana]             | 99%         | 0.0     | 100.00%  | XP_028520421.1 |
| AcerOR29   | Yes         | 351      | 6   | odorant receptor 4 isoform X1 [Apis cerana]         | 97%         | 0.0     | 97.98%   | XP_016910454.1 |
| AcerOR14   | Yes         | 351      | 6   | odorant receptor 49b-like isoform X2 [Apis cerana]  | 94%         | 0.0     | 100.00%  | XP_016910314.1 |
| AcerOR25b  | Yes         | 348      | 6   | Odorant receptor 43a [Apis cerana cerana]           | 96%         | 0.0     | 97.31%   | PBC34543.1     |
| AcerOR25a  | Yes         | 344      | 6   | odorant receptor 22c-like [Apis cerana]             | 97%         | 0.0     | 99.10%   | XP_016910425.1 |
| AcerOR173N | No          | 344      | 6   | odorant receptor 4-like [Apis dorsata]              | 98%         | 0.0     | 92.35%   | XP_031368101.1 |
| AcerOR66aC | No          | 343      | 6   | odorant receptor 2a-like isoform X5 [Apis dorsata]  | 97%         | 0.0     | 92.84%   | XP_031365757.1 |
| AcerOR162  | Yes         | 473      | 5   | odorant receptor 13a-like [Apis florea]             | 80%         | 0.0     | 92.91%   | XP_031774348.1 |
| AcerOR15b  | Yes         | 428      | 5   | odorant receptor Or2-like isoform X4 [Apis cerana]  | 100%        | 0.0     | 99.77%   | XP_016910304.1 |
| AcerOR15a  | Yes         | 428      | 5   | odorant receptor Or2-like isoform X4 [Apis cerana]  | 100%        | 0.0     | 100.00%  | XP_016910304.1 |
| AcerOR53b  | Yes         | 412      | 5   | odorant receptor 53 [Apis mellifera]                | 100%        | 0.0     | 98.06%   | NP_001229907.1 |
| AcerOR53a  | Yes         | 410      | 5   | odorant receptor 53 [Apis mellifera]                | 100%        | 0.0     | 95.86%   | NP_001229907.1 |
| AcerOR161b | Yes         | 410      | 5   | odorant receptor 13a-like [Apis florea]             | 100%        | 0.0     | 89.76%   | XP_031774348.1 |
| AcerOR54b  | Yes         | 408      | 5   | odorant receptor 4-like isoform X2 [Apis mellifera] | 100%        | 0.0     | 96.33%   | XP_026294763.1 |
| AcerOR54a  | Yes         | 408      | 5   | odorant receptor 4-like isoform X2 [Apis mellifera] | 100%        | 0.0     | 96.82%   | XP_026294763.1 |
| AcerOR62a  | Yes         | 406      | 5   | odorant receptor 63 isoform X1 [Apis mellifera]     | 100%        | 0.0     | 94.33%   | XP_006563549.2 |
| AcerOR86b  | Yes         | 400      | 5   | odorant receptor 30a-like isoform X1 [Apis cerana]  | 100%        | 0.0     | 100.00%  | XP_016904181.1 |
| AcerOR161a | Yes         | 397      | 5   | odorant receptor 13a-like [Apis florea]             | 100%        | 0.0     | 92.70%   | XP_031774348.1 |
| AcerOR86a  | Yes         | 394      | 5   | odorant receptor 30a-like isoform X1 [Apis cerana]  | 96%         | 0.0     | 99.74%   | XP_016904181.1 |

| Gene      | Full-length | ORF (aa) | TMD | BLASTX best hit                                    |             |         |          |                |
|-----------|-------------|----------|-----|----------------------------------------------------|-------------|---------|----------|----------------|
|           |             |          |     | Description                                        | Query cover | E-value | Identity | Accession      |
| AcerOR114 | Yes         | 383      | 5   | odorant receptor 4-like [Apis mellifera]           | 100%        | 0.0     | 97.39%   | XP_026294928.1 |
| AcerOR167 | Yes         | 373      | 5   | odorant receptor 167 [Apis cerana cerana]          | 98%         | 0.0     | 100.00%  | ALR81939.1     |
| AcerOR71a | Yes         | 371      | 5   | odorant receptor Or1-like isoform X4 [Apis cerana] | 100%        | 0.0     | 99.46%   | XP_016905290.1 |
| AcerOR94  | Yes         | 368      | 5   | odorant receptor 13a-like [Apis cerana]            | 100%        | 0.0     | 100.00%  | XP_016904174.1 |
| AcerOR83  | Yes         | 347      | 5   | odorant receptor 13a-like isoform X2 [Apis cerana] | 100%        | 0.0     | 97.41%   | XP_028520896.1 |
| AcerOR70  | Yes         | 345      | 5   | odorant receptor Or1-like isoform X4 [Apis cerana] | 67%         | 6e-160  | 100.00%  | XP_016905290.1 |
| AcerOR21  | Yes         | 339      | 5   | odorant receptor 85b-like [Apis florea]            | 98%         | 0.0     | 91.34%   | XP_031770828.1 |

**Table S6** Detailed information on the glomeruli of queens from *A. cerana*.

| Glomerulus | Volume( $10^3\mu\text{m}^3$ ) | RelativeVolume(%) | Area( $10^3\mu\text{m}^2$ ) | RelativeArea(%)  | Class |
|------------|-------------------------------|-------------------|-----------------------------|------------------|-------|
| AL1        | $17.70 \pm 3.97$              | $0.97 \pm 0.20$   | $3.92 \pm 0.56$             | $0.98 \pm 0.15$  | 3     |
| AL2        | $32.27 \pm 14.60$             | $1.79 \pm 0.77$   | $5.55 \pm 1.72$             | $1.38 \pm 0.340$ | 1     |
| AL3        | $10.94 \pm 4.02$              | $0.60 \pm 0.22$   | $2.80 \pm 0.69$             | $0.70 \pm 0.18$  | 2     |
| AL4        | $30.35 \pm 2.25$              | $0.57 \pm 0.11$   | $2.63 \pm 0.31$             | $0.66 \pm 0.08$  | 3     |
| AL5        | $20.71 \pm 4.49$              | $1.14 \pm 0.26$   | $4.13 \pm 0.66$             | $1.03 \pm 0.16$  | 1     |
| AL6        | $15.28 \pm 5.43$              | $0.84 \pm 0.30$   | $3.40 \pm 0.78$             | $0.85 \pm 0.19$  | 2     |
| AL7        | $15.69 \pm 5.65$              | $0.87 \pm 0.32$   | $3.69 \pm 0.95$             | $0.93 \pm 0.25$  | 2     |
| AL8        | $38.36 \pm 9.07$              | $2.11 \pm 0.47$   | $6.47 \pm 0.96$             | $1.62 \pm 0.26$  | 1     |
| AL9        | $16.39 \pm 2.07$              | $0.90 \pm 0.11$   | $3.69 \pm 0.33$             | $0.93 \pm 0.10$  | 2     |
| AL10       | $15.56 \pm 6.42$              | $0.85 \pm 0.34$   | $3.54 \pm 0.97$             | $0.89 \pm 0.25$  | 2     |
| AL11       | $21.69 \pm 8.00$              | $1.20 \pm 0.45$   | $4.42 \pm 1.06$             | $1.11 \pm 0.27$  | 2     |
| AL12       | $31.42 \pm 9.25$              | $1.75 \pm 0.57$   | $5.43 \pm 1.13$             | $1.36 \pm 0.30$  | 2     |
| AL13       | $17.44 \pm 0.64$              | $0.97 \pm 0.04$   | $3.68 \pm 0.04$             | $0.93 \pm 0.03$  | 4     |
| AL14       | $16.72 \pm 5.92$              | $0.94 \pm 0.35$   | $3.55 \pm 0.85$             | $0.89 \pm 0.23$  | 1     |
| AL15       | $23.62 \pm 8.02$              | $1.31 \pm 0.47$   | $4.59 \pm 1.17$             | $1.15 \pm 0.31$  | 1     |
| AM1        | $9.70 \pm 1.63$               | $0.54 \pm 0.11$   | $2.50 \pm 0.27$             | $0.63 \pm 0.07$  | 2     |
| AM2        | $18.73 \pm 7.08$              | $1.02 \pm 0.37$   | $3.95 \pm 0.96$             | $0.98 \pm 0.22$  | 2     |
| AM3        | $11.20 \pm 4.98$              | $0.62 \pm 0.28$   | $2.65 \pm 0.83$             | $0.67 \pm 0.21$  | 1     |
| AM4        | $11.64 \pm 8.53$              | $0.65 \pm 0.48$   | $2.71 \pm 1.32$             | $0.68 \pm 0.34$  | 1     |
| AM5        | $6.58 \pm 3.95$               | $0.37 \pm 0.23$   | $1.85 \pm 0.81$             | $0.47 \pm 0.21$  | 2     |
| AM6        | $23.38 \pm 9.43$              | $1.27 \pm 0.49$   | $4.74 \pm 1.25$             | $1.18 \pm 0.29$  | 4     |
| AM7        | $16.89 \pm 9.33$              | $0.93 \pm 0.50$   | $3.89 \pm 1.80$             | $0.97 \pm 0.42$  | 4     |
| AM8        | $8.36 \pm 3.43$               | $0.45 \pm 0.17$   | $2.33 \pm 0.70$             | $0.58 \pm 0.17$  | 2     |
| AM9        | $12.79 \pm 3.72$              | $0.70 \pm 0.19$   | $3.02 \pm 0.64$             | $0.75 \pm 0.15$  | 3     |
| AM10       | $16.19 \pm 9.02$              | $0.88 \pm 0.48$   | $3.50 \pm 1.29$             | $0.87 \pm 0.30$  | 1     |
| AM11       | $12.98 \pm 3.65$              | $0.71 \pm 0.19$   | $3.05 \pm 0.39$             | $0.76 \pm 0.11$  | 4     |
| AM12       | $13.05 \pm 11.46$             | $0.74 \pm 0.67$   | $3.08 \pm 1.97$             | $0.77 \pm 0.51$  | 4     |
| AM13       | $22.53 \pm 4.01$              | $1.25 \pm 0.27$   | $4.80 \pm 0.65$             | $1.19 \pm 0.17$  | 2     |
| AM14       | $13.55 \pm 2.26$              | $0.74 \pm 0.11$   | $3.16 \pm 0.30$             | $0.79 \pm 0.08$  | 2     |
| AM15       | $11.40 \pm 3.34$              | $0.62 \pm 0.17$   | $3.00 \pm 0.75$             | $0.74 \pm 0.17$  | 1     |
| AM16       | $8.39 \pm 3.07$               | $0.46 \pm 0.16$   | $2.24 \pm 0.54$             | $0.56 \pm 0.14$  | 2     |
| AM17       | $10.42 \pm 4.57$              | $0.58 \pm 0.28$   | $2.96 \pm 1.16$             | $0.74 \pm 0.30$  | 1     |
| AM18       | $26.93 \pm 8.48$              | $1.49 \pm 0.50$   | $5.20 \pm 1.22$             | $1.31 \pm 0.32$  | 4     |
| AM19       | $13.54 \pm 5.40$              | $0.75 \pm 0.31$   | $3.24 \pm 0.99$             | $0.81 \pm 0.25$  | 2     |
| AM20       | $10.08 \pm 4.64$              | $0.55 \pm 0.24$   | $2.56 \pm 0.84$             | $0.64 \pm 0.21$  | 1     |
| AM21       | $25.08 \pm 2.12$              | $1.37 \pm 0.10$   | $4.74 \pm 0.26$             | $1.18 \pm 0.09$  | 2     |
| AM22       | $22.73 \pm 1.92$              | $1.24 \pm 0.07$   | $4.70 \pm 0.15$             | $1.17 \pm 0.06$  | 1     |
| AV1        | $14.64 \pm 2.01$              | $0.80 \pm 0.08$   | $3.32 \pm 0.30$             | $0.83 \pm 0.07$  | 1     |
| AV2        | $14.72 \pm 11.21$             | $0.82 \pm 0.63$   | $3.16 \pm 1.61$             | $0.79 \pm 0.41$  | 2     |
| AV3        | $7.63 \pm 5.99$               | $0.42 \pm 0.34$   | $2.07 \pm 1.09$             | $0.52 \pm 0.28$  | 2     |
| AV4        | $16.56 \pm 3.16$              | $0.92 \pm 0.20$   | $3.76 \pm 0.65$             | $0.94 \pm 0.17$  | 3     |
| AV5        | $19.75 \pm 1.16$              | $1.09 \pm 0.11$   | $4.08 \pm 0.16$             | $1.03 \pm 0.05$  | 1     |

| Glomerulus | Volume( $10^3\mu\text{m}^3$ ) | RelativeVolume(%) | Area( $10^3\mu\text{m}^2$ ) | RelativeArea(%) | Class |
|------------|-------------------------------|-------------------|-----------------------------|-----------------|-------|
| AV6        | $14.43 \pm 3.08$              | $0.79 \pm 0.16$   | $3.21 \pm 0.35$             | $0.80 \pm 0.08$ | 1     |
| AV7        | $22.40 \pm 3.55$              | $1.23 \pm 0.19$   | $4.34 \pm 0.46$             | $1.09 \pm 0.11$ | 1     |
| AV8        | $18.33 \pm 9.10$              | $1.01 \pm 0.50$   | $3.64 \pm 1.28$             | $0.91 \pm 0.31$ | 1     |
| LD1        | $28.74 \pm 6.55$              | $1.58 \pm 0.33$   | $5.56 \pm 1.03$             | $1.39 \pm 0.23$ | 1     |
| LD2        | $18.93 \pm 7.50$              | $1.04 \pm 0.42$   | $4.09 \pm 1.05$             | $1.03 \pm 0.27$ | 4     |
| LD3        | $7.91 \pm 2.82$               | $0.44 \pm 0.15$   | $2.40 \pm 0.49$             | $0.60 \pm 0.11$ | 1     |
| MD1        | $21.40 \pm 5.96$              | $1.17 \pm 0.29$   | $4.38 \pm 0.88$             | $1.09 \pm 0.21$ | 1     |
| MD2        | $11.19 \pm 3.54$              | $0.62 \pm 0.20$   | $2.82 \pm 0.72$             | $0.71 \pm 0.19$ | 2     |
| MD3        | $29.53 \pm 5.32$              | $1.63 \pm 0.34$   | $5.43 \pm 0.90$             | $1.36 \pm 0.25$ | 1     |
| MD4        | $8.95 \pm 3.28$               | $0.50 \pm 0.17$   | $2.38 \pm 0.57$             | $0.59 \pm 0.13$ | 2     |
| MD5        | $18.85 \pm 4.18$              | $1.03 \pm 0.20$   | $4.14 \pm 0.38$             | $1.04 \pm 0.09$ | 2     |
| P1         | $11.90 \pm 2.77$              | $0.66 \pm 0.16$   | $2.89 \pm 0.35$             | $0.72 \pm 0.10$ | 1     |
| P2         | $7.83 \pm 2.73$               | $0.43 \pm 0.15$   | $2.16 \pm 0.66$             | $0.54 \pm 0.16$ | 1     |
| P3         | $5.11 \pm 2.75$               | $0.28 \pm 0.15$   | $1.60 \pm 0.63$             | $0.40 \pm 0.15$ | 2     |
| P4         | $3.86 \pm 1.65$               | $0.22 \pm 0.09$   | $1.33 \pm 0.40$             | $0.34 \pm 0.10$ | 1     |
| P5         | $21.98 \pm 6.42$              | $1.20 \pm 0.33$   | $4.23 \pm 0.93$             | $1.05 \pm 0.21$ | 1     |
| P6         | $4.76 \pm 1.52$               | $0.26 \pm 0.08$   | $1.60 \pm 0.39$             | $0.40 \pm 0.09$ | 1     |
| P7         | $11.07 \pm 4.96$              | $0.60 \pm 0.25$   | $2.67 \pm 0.70$             | $0.67 \pm 0.18$ | 2     |
| P8         | $10.78 \pm 5.14$              | $0.61 \pm 0.30$   | $2.78 \pm 1.08$             | $0.70 \pm 0.28$ | 1     |
| P9         | $8.73 \pm 1.50$               | $0.49 \pm 0.07$   | $2.37 \pm 0.35$             | $0.59 \pm 0.08$ | 3     |
| PD1        | $23.23 \pm 7.37$              | $1.27 \pm 0.38$   | $4.86 \pm 1.20$             | $1.21 \pm 0.30$ | 1     |
| PD2        | $19.68 \pm 7.74$              | $1.07 \pm 0.39$   | $4.10 \pm 1.18$             | $1.02 \pm 0.29$ | 1     |
| PD3        | $18.78 \pm 8.11$              | $1.04 \pm 0.45$   | $4.15 \pm 1.37$             | $1.04 \pm 0.35$ | 1     |
| PD4        | $14.92 \pm 5.23$              | $0.82 \pm 0.29$   | $3.41 \pm 0.89$             | $0.85 \pm 0.23$ | 4     |
| PD5        | $15.31 \pm 2.80$              | $0.84 \pm 0.15$   | $3.81 \pm 0.49$             | $0.95 \pm 0.13$ | 4     |
| PD6        | $7.99 \pm 3.18$               | $0.44 \pm 0.17$   | $2.26 \pm 0.69$             | $0.56 \pm 0.16$ | 4     |
| PD7        | $14.34 \pm 7.90$              | $0.78 \pm 0.40$   | $3.36 \pm 1.21$             | $0.85 \pm 0.30$ | 2     |
| PL1        | $11.16 \pm 2.88$              | $0.61 \pm 0.14$   | $2.66 \pm 0.45$             | $0.66 \pm 0.11$ | 2     |
| PL2        | $31.11 \pm 8.96$              | $1.72 \pm 0.51$   | $5.50 \pm 1.32$             | $1.38 \pm 0.34$ | 1     |
| PL3        | $9.82 \pm 0.86$               | $0.54 \pm 0.04$   | $2.57 \pm 0.19$             | $0.64 \pm 0.04$ | 2     |
| PL4        | $17.36 \pm 4.60$              | $0.94 \pm 0.22$   | $3.73 \pm 0.58$             | $0.93 \pm 0.15$ | 2     |
| PL5        | $27.51 \pm 5.40$              | $1.52 \pm 0.34$   | $5.48 \pm 0.84$             | $1.37 \pm 0.20$ | 1     |
| PL6        | $22.45 \pm 4.89$              | $1.24 \pm 0.27$   | $4.55 \pm 0.78$             | $1.14 \pm 0.18$ | 1     |
| PL7        | $16.48 \pm 5.74$              | $0.91 \pm 0.32$   | $3.61 \pm 1.01$             | $0.90 \pm 0.26$ | 2     |
| PL8        | $11.71 \pm 4.95$              | $0.64 \pm 0.27$   | $2.99 \pm 1.05$             | $0.75 \pm 0.25$ | 4     |
| PL9        | $19.21 \pm 8.66$              | $1.06 \pm 0.48$   | $3.98 \pm 1.48$             | $0.99 \pm 0.36$ | 3     |
| PL10       | $15.41 \pm 7.38$              | $0.86 \pm 0.42$   | $3.68 \pm 1.02$             | $0.92 \pm 0.27$ | 3     |
| PL11       | $14.50 \pm 8.35$              | $0.80 \pm 0.46$   | $3.30 \pm 1.42$             | $0.82 \pm 0.36$ | 2     |
| PL12       | $16.44 \pm 5.04$              | $0.91 \pm 0.30$   | $3.83 \pm 0.87$             | $0.96 \pm 0.23$ | 1     |
| PL13       | $12.64 \pm 8.09$              | $0.68 \pm 0.42$   | $2.94 \pm 1.31$             | $0.74 \pm 0.33$ | 2     |
| PL14       | $9.42 \pm 0.08$               | $0.53 \pm 0.01$   | $2.44 \pm 0.07$             | $0.62 \pm 0.02$ | 3     |
| PM1        | $13.39 \pm 6.49$              | $0.75 \pm 0.39$   | $3.27 \pm 0.96$             | $0.82 \pm 0.25$ | 1     |
| PM2        | $11.39 \pm 7.99$              | $0.62 \pm 0.41$   | $2.79 \pm 1.28$             | $0.70 \pm 0.32$ | 3     |

| Glomerulus | Volume( $10^3\mu\text{m}^3$ ) | RelativeVolume(%) | Area( $10^3\mu\text{m}^2$ ) | RelativeArea(%) | Class |
|------------|-------------------------------|-------------------|-----------------------------|-----------------|-------|
| PM3        | $7.60 \pm 0.95$               | $0.41 \pm 0.04$   | $2.19 \pm 0.17$             | $0.55 \pm 0.05$ | 2     |
| PM4        | $8.07 \pm 1.65$               | $0.44 \pm 0.10$   | $2.48 \pm 0.49$             | $0.62 \pm 0.12$ | 2     |
| PM5        | $20.14 \pm 3.24$              | $1.09 \pm 0.17$   | $3.99 \pm 0.41$             | $0.99 \pm 0.12$ | 4     |
| PM6        | $14.83 \pm 5.48$              | $0.81 \pm 0.29$   | $3.32 \pm 0.82$             | $0.83 \pm 0.19$ | 1     |
| PM7        | $20.47 \pm 9.56$              | $1.14 \pm 0.53$   | $4.04 \pm 1.46$             | $1.01 \pm 0.36$ | 1     |
| PM8        | $8.36 \pm 3.08$               | $0.46 \pm 0.15$   | $2.39 \pm 0.54$             | $0.60 \pm 0.13$ | 4     |
| PM9        | $11.47 \pm 3.64$              | $0.63 \pm 0.21$   | $2.88 \pm 0.62$             | $0.72 \pm 0.16$ | 1     |
| PM10       | $21.23 \pm 2.91$              | $1.17 \pm 0.17$   | $4.34 \pm 0.49$             | $1.09 \pm 0.14$ | 1     |
| PM11       | $19.85 \pm 4.11$              | $1.09 \pm 0.21$   | $3.98 \pm 0.52$             | $1.00 \pm 0.13$ | 4     |
| PM12       | $14.26 \pm 2.19$              | $0.78 \pm 0.12$   | $3.28 \pm 0.25$             | $0.82 \pm 0.06$ | 2     |
| PM13       | $8.19 \pm 3.89$               | $0.45 \pm 0.20$   | $2.27 \pm 0.68$             | $0.57 \pm 0.17$ | 4     |
| PM14       | $12.93 \pm 4.77$              | $0.71 \pm 0.26$   | $3.17 \pm 0.88$             | $0.79 \pm 0.23$ | 3     |
| PM15       | $17.58 \pm 9.58$              | $0.97 \pm 0.53$   | $4.07 \pm 1.94$             | $1.01 \pm 0.47$ | 1     |
| PM16       | $12.92 \pm 6.08$              | $0.70 \pm 0.31$   | $3.07 \pm 0.92$             | $0.77 \pm 0.24$ | 4     |
| PM17       | $20.01 \pm 11.56$             | $1.09 \pm 0.63$   | $4.16 \pm 1.85$             | $1.03 \pm 0.44$ | 4     |
| PM18       | $19.25 \pm 7.35$              | $1.05 \pm 0.38$   | $4.27 \pm 1.17$             | $1.07 \pm 0.30$ | 2     |
| PM19       | $13.45 \pm 5.63$              | $0.75 \pm 0.33$   | $3.42 \pm 0.93$             | $0.86 \pm 0.24$ | 4     |
| PM20       | $9.38 \pm 4.70$               | $0.52 \pm 0.26$   | $2.32 \pm 0.83$             | $0.58 \pm 0.20$ | 2     |
| PM21       | $13.22 \pm 8.90$              | $0.71 \pm 0.46$   | $3.40 \pm 1.78$             | $0.84 \pm 0.44$ | 1     |
| PM22       | $23.33 \pm 9.14$              | $1.28 \pm 0.49$   | $4.57 \pm 1.46$             | $1.14 \pm 0.36$ | 4     |
| PM23       | $14.76 \pm 8.55$              | $0.82 \pm 0.50$   | $3.17 \pm 1.34$             | $0.80 \pm 0.34$ | 2     |
| PM24       | $18.07 \pm 8.57$              | $0.98 \pm 0.44$   | $3.90 \pm 1.11$             | $0.98 \pm 0.28$ | 4     |
| PM25       | $9.72 \pm 3.32$               | $0.54 \pm 0.19$   | $2.58 \pm 0.67$             | $0.64 \pm 0.16$ | 2     |
| PM26       | $15.46 \pm 5.36$              | $0.86 \pm 0.31$   | $3.47 \pm 0.95$             | $0.87 \pm 0.24$ | 4     |
| PM27       | $13.52 \pm 8.93$              | $0.72 \pm 0.46$   | $3.02 \pm 1.42$             | $0.76 \pm 0.36$ | 2     |
| PM28       | $7.23 \pm 0.53$               | $0.39 \pm 0.03$   | $2.14 \pm 0.23$             | $0.53 \pm 0.05$ | 1     |
| VC1        | $11.90 \pm 4.00$              | $0.65 \pm 0.21$   | $2.76 \pm 0.66$             | $0.69 \pm 0.15$ | 1     |
| VC2        | $8.90 \pm 1.95$               | $0.49 \pm 0.09$   | $2.30 \pm 0.35$             | $0.57 \pm 0.08$ | 1     |
| VC3        | $7.79 \pm 3.23$               | $0.42 \pm 0.16$   | $2.11 \pm 0.58$             | $0.53 \pm 0.14$ | 1     |
| VC4        | $15.57 \pm 4.52$              | $0.86 \pm 0.25$   | $3.26 \pm 0.65$             | $0.81 \pm 0.16$ | 1     |
| VC5        | $12.49 \pm 4.91$              | $0.70 \pm 0.30$   | $2.95 \pm 0.87$             | $0.74 \pm 0.23$ | 1     |
| VC6        | $5.38 \pm 1.64$               | $0.29 \pm 0.08$   | $1.58 \pm 0.33$             | $0.39 \pm 0.08$ | 4     |
| VC7        | $15.71 \pm 4.67$              | $0.86 \pm 0.25$   | $3.47 \pm 0.69$             | $0.87 \pm 0.18$ | 1     |
| VC8        | $12.34 \pm 2.65$              | $0.68 \pm 0.13$   | $2.88 \pm 0.41$             | $0.72 \pm 0.09$ | 1     |
| VC9        | $18.18 \pm 4.98$              | $1.00 \pm 0.27$   | $3.69 \pm 0.69$             | $0.92 \pm 0.15$ | 1     |
| VC10       | $21.37 \pm 3.82$              | $1.17 \pm 0.18$   | $4.28 \pm 0.56$             | $1.07 \pm 0.14$ | 1     |
| VC11       | $22.11 \pm 3.76$              | $1.23 \pm 0.24$   | $4.35 \pm 0.59$             | $1.10 \pm 0.15$ | 3     |
| VC12       | $11.92 \pm 4.34$              | $0.66 \pm 0.24$   | $2.82 \pm 0.81$             | $0.71 \pm 0.20$ | 2     |
| VC13       | $11.96 \pm 5.15$              | $0.65 \pm 0.27$   | $2.80 \pm 0.86$             | $0.70 \pm 0.22$ | 4     |
| VC14       | $9.59 \pm 5.08$               | $0.53 \pm 0.28$   | $2.57 \pm 1.02$             | $0.64 \pm 0.24$ | 4     |

Four classes were identified according to the differences in glomerulus positioning and shape through four sets of data for each caste: (1) relatively consistent positioning and shape, (2) the shape is consistent but the positioning is inconsistent, (3) the positioning is consistent but the shape is inconsistent, (4) the shape and

positioning are inconsistent.

**Table S7** Detailed information on the glomeruli of drones from *A. cerana*.

| Glomerulus | Volume (10 <sup>3</sup> μm <sup>3</sup> ) | Relative Volume (%) | Area (10 <sup>3</sup> μm <sup>2</sup> ) | Relative Area (%) | Class |
|------------|-------------------------------------------|---------------------|-----------------------------------------|-------------------|-------|
| AL1        | 44.40 ± 6.28                              | 2.18 ± 0.31         | 7.52 ± 0.57                             | 2.07 ± 0.15       | 1     |
| AL2        | 13.66 ± 4.13                              | 0.68 ± 0.22         | 3.11 ± 0.65                             | 0.86 ± 0.18       | 1     |
| AL3        | 14.14 ± 2.55                              | 0.69 ± 0.08         | 3.42 ± 0.35                             | 0.94 ± 0.09       | 1     |
| AL4        | 10.35 ± 2.74                              | 0.51 ± 0.14         | 2.58 ± 0.48                             | 0.71 ± 0.13       | 1     |
| AL5        | 18.90 ± 5.32                              | 0.93 ± 0.27         | 4.03 ± 0.76                             | 1.11 ± 0.22       | 1     |
| AL6        | 34.82 ± 7.31                              | 1.69 ± 0.24         | 6.48 ± 1.10                             | 1.78 ± 0.28       | 1     |
| AL7        | 13.40 ± 2.70                              | 0.65 ± 0.09         | 3.29 ± 0.32                             | 0.90 ± 0.08       | 1     |
| AL8        | 18.33 ± 7.61                              | 0.94 ± 0.40         | 4.05 ± 1.35                             | 1.12 ± 0.39       | 3     |
| AL9        | 13.14 ± 5.28                              | 0.63 ± 0.26         | 3.24 ± 1.00                             | 0.88 ± 0.27       | 2     |
| AL10       | 25.37 ± 8.70                              | 1.24 ± 0.44         | 5.75 ± 1.78                             | 1.58 ± 0.49       | 2     |
| AL11       | 18.98 ± 2.27                              | 0.93 ± 0.13         | 4.52 ± 0.85                             | 1.24 ± 0.24       | 1     |
| AM1        | 21.16 ± 5.07                              | 1.03 ± 0.19         | 4.31 ± 0.57                             | 1.18 ± 0.14       | 2     |
| AM2        | 7.73 ± 2.35                               | 0.38 ± 0.13         | 2.20 ± 0.46                             | 0.61 ± 0.13       | 1     |
| AM3        | 19.05 ± 4.70                              | 0.92 ± 0.18         | 4.50 ± 0.85                             | 1.23 ± 0.21       | 1     |
| AM4        | 22.74 ± 2.83                              | 1.11 ± 0.14         | 4.60 ± 0.16                             | 1.27 ± 0.06       | 3     |
| AM5        | 10.90 ± 4.58                              | 0.53 ± 0.22         | 2.87 ± 0.71                             | 0.79 ± 0.19       | 4     |
| AM6        | 17.67 ± 13.26                             | 0.88 ± 0.70         | 3.84 ± 2.17                             | 1.06 ± 0.62       | 4     |
| AM7        | 30.94 ± 13.73                             | 1.45 ± 0.54         | 5.73 ± 1.36                             | 1.56 ± 0.35       | 4     |
| AM8        | 12.18 ± 2.52                              | 0.59 ± 0.10         | 3.19 ± 0.52                             | 0.88 ± 0.14       | 4     |
| AM9        | 17.98 ± 3.18                              | 0.88 ± 0.16         | 4.31 ± 0.34                             | 1.19 ± 0.11       | 2     |
| AM10       | 13.49 ± 2.14                              | 0.66 ± 0.10         | 3.34 ± 0.24                             | 0.92 ± 0.07       | 1     |
| AM11       | 13.31 ± 3.66                              | 0.66 ± 0.21         | 3.47 ± 0.80                             | 0.95 ± 0.23       | 1     |
| AM12       | 15.05 ± 5.01                              | 0.75 ± 0.27         | 3.66 ± 0.93                             | 1.01 ± 0.27       | 1     |
| AM13       | 12.17 ± 5.09                              | 0.61 ± 0.27         | 3.26 ± 1.12                             | 0.90 ± 0.31       | 2     |
| AM14       | 18.67 ± 7.00                              | 0.94 ± 0.40         | 4.21 ± 0.90                             | 1.16 ± 0.26       | 1     |
| AM15       | 34.18 ± 14.26                             | 1.68 ± 0.70         | 6.61 ± 1.75                             | 1.82 ± 0.48       | 3     |
| AM16       | 17.99 ± 6.31                              | 0.89 ± 0.34         | 4.15 ± 0.88                             | 1.14 ± 0.24       | 4     |
| AM17       | 17.07 ± 11.53                             | 0.88 ± 0.60         | 3.94 ± 2.03                             | 1.09 ± 0.56       | 3     |
| AM18       | 13.73 ± 1.98                              | 0.66 ± 0.15         | 3.32 ± 0.37                             | 0.91 ± 0.11       | 2     |
| AM19       | 11.91 ± 2.28                              | 0.62 ± 0.12         | 3.00 ± 0.36                             | 0.84 ± 0.11       | 2     |
| AM20       | 22.58 ± 11.67                             | 1.18 ± 0.61         | 5.05 ± 2.05                             | 1.41 ± 0.58       | 4     |
| MGa        | 155.83 ± 23.04                            | 7.63 ± 1.08         | 17.67 ± 1.93                            | 4.85 ± 0.51       | 1     |
| MGb        | 258.67 ± 40.82                            | 12.59 ± 1.14        | 27.91 ± 1.87                            | 7.66 ± 0.41       | 1     |
| Gc         | 103.29 ± 11.47                            | 4.91 ± 0.12         | 12.92 ± 0.41                            | 3.55 ± 0.03       | 1     |
| MGd        | 151.93 ± 28.51                            | 7.39 ± 1.06         | 17.57 ± 1.85                            | 4.83 ± 0.47       | 1     |
| MV1        | 29.01 ± 7.25                              | 1.44 ± 0.40         | 5.41 ± 0.75                             | 1.49 ± 0.22       | 1     |
| MV2        | 26.70 ± 6.20                              | 1.32 ± 0.37         | 5.24 ± 0.77                             | 1.44 ± 0.23       | 2     |
| MV3        | 14.77 ± 1.36                              | 0.72 ± 0.05         | 3.44 ± 0.14                             | 0.95 ± 0.05       | 1     |
| MV4        | 18.98 ± 2.71                              | 0.94 ± 0.18         | 4.22 ± 0.57                             | 1.16 ± 0.17       | 2     |
| MV5        | 14.58 ± 5.61                              | 0.72 ± 0.29         | 3.35 ± 0.82                             | 0.92 ± 0.22       | 2     |
| MV6        | 23.74 ± 1.77                              | 1.17 ± 0.10         | 4.53 ± 0.14                             | 1.25 ± 0.04       | 1     |
| MV7        | 63.46 ± 6.00                              | 3.02 ± 0.02         | 9.52 ± 0.28                             | 2.61 ± 0.02       | 1     |

| Glomerulus | Volume (10 <sup>3</sup> μm <sup>3</sup> ) | Relative Volume (%) | Area (10 <sup>3</sup> μm <sup>2</sup> ) | Relative Area (%) | Class |
|------------|-------------------------------------------|---------------------|-----------------------------------------|-------------------|-------|
| PL1        | 16.05 ± 9.26                              | 0.82 ± 0.48         | 3.65 ± 1.37                             | 1.01 ± 0.38       | 2     |
| PL2        | 21.46 ± 9.46                              | 1.05 ± 0.46         | 4.32 ± 1.49                             | 1.19 ± 0.41       | 4     |
| PL3        | 24.13 ± 4.08                              | 1.17 ± 0.12         | 4.75 ± 0.30                             | 1.31 ± 0.06       | 4     |
| PL4        | 18.83 ± 2.78                              | 0.93 ± 0.19         | 4.09 ± 0.26                             | 1.12 ± 0.09       | 2     |
| PL5        | 17.85 ± 8.26                              | 0.89 ± 0.41         | 4.22 ± 1.49                             | 1.16 ± 0.41       | 1     |
| PL6        | 25.50 ± 7.05                              | 1.27 ± 0.39         | 5.08 ± 1.15                             | 1.40 ± 0.32       | 2     |
| PL7        | 28.10 ± 6.24                              | 1.37 ± 0.26         | 5.40 ± 0.79                             | 1.48 ± 0.22       | 1     |
| PL8        | 58.37 ± 38.75                             | 2.84 ± 1.95         | 8.68 ± 4.08                             | 2.38 ± 1.11       | 1     |
| PL9        | 21.86 ± 6.44                              | 1.06 ± 0.27         | 4.60 ± 1.02                             | 1.26 ± 0.26       | 2     |
| PL10       | 22.20 ± 3.88                              | 1.08 ± 0.14         | 4.45 ± 0.39                             | 1.22 ± 0.09       | 3     |
| PL11       | 53.57 ± 5.58                              | 2.62 ± 0.24         | 8.88 ± 0.79                             | 2.44 ± 0.22       | 1     |
| PL12       | 21.21 ± 7.00                              | 1.04 ± 0.37         | 4.56 ± 1.43                             | 1.25 ± 0.40       | 2     |
| PL13       | 24.79 ± 0.94                              | 1.25 ± 0.09         | 5.15 ± 0.28                             | 1.43 ± 0.09       | 4     |
| PL14       | 26.33 ± 9.25                              | 1.30 ± 0.54         | 5.16 ± 1.40                             | 1.42 ± 0.41       | 2     |
| PL15       | 32.69 ± 14.00                             | 1.48 ± 0.57         | 5.95 ± 1.75                             | 1.61 ± 0.46       | 1     |
| PL16       | 45.15 ± 10.50                             | 2.12 ± 0.60         | 7.96 ± 1.09                             | 2.16 ± 0.31       | 1     |
| PM1        | 15.63 ± 5.31                              | 0.78 ± 0.29         | 3.76 ± 0.78                             | 1.03 ± 0.22       | 3     |
| PM2        | 8.33 ± 1.66                               | 0.41 ± 0.11         | 2.32 ± 0.26                             | 0.64 ± 0.08       | 1     |
| PM3        | 8.86 ± 3.85                               | 0.45 ± 0.21         | 2.61 ± 0.87                             | 0.72 ± 0.25       | 2     |
| PM4        | 22.08 ± 5.98                              | 1.10 ± 0.34         | 4.61 ± 0.78                             | 1.27 ± 0.23       | 1     |
| PM5        | 11.23 ± 2.01                              | 0.55 ± 0.09         | 3.09 ± 0.51                             | 0.85 ± 0.13       | 4     |
| PM6        | 19.50 ± 12.54                             | 0.93 ± 0.57         | 4.14 ± 2.02                             | 1.13 ± 0.54       | 4     |
| PM7        | 14.21 ± 6.23                              | 0.68 ± 0.27         | 3.22 ± 0.88                             | 0.88 ± 0.23       | 2     |
| PM8        | 14.34 ± 5.35                              | 0.71 ± 0.28         | 3.70 ± 0.96                             | 1.02 ± 0.27       | 3     |
| PM9        | 29.37 ± 4.87                              | 1.44 ± 0.22         | 5.63 ± 0.65                             | 1.55 ± 0.17       | 1     |
| PM10       | 27.46 ± 7.62                              | 1.34 ± 0.34         | 5.39 ± 0.90                             | 1.48 ± 0.25       | 2     |
| PM11       | 16.95 ± 4.68                              | 0.86 ± 0.26         | 4.16 ± 0.87                             | 1.14 ± 0.25       | 2     |
| PM12       | 27.16 ± 9.97                              | 1.33 ± 0.47         | 5.49 ± 1.58                             | 1.51 ± 0.43       | 1     |
| PM13       | 11.33 ± 0.69                              | 0.54 ± 0.01         | 2.91 ± 0.15                             | 0.79 ± 0.03       | 2     |
| PM14       | 10.38 ± 2.22                              | 0.52 ± 0.10         | 2.89 ± 0.57                             | 0.80 ± 0.15       | 2     |
| PD1        | 40.14 ± 14.77                             | 1.94 ± 0.66         | 7.45 ± 2.05                             | 2.04 ± 0.54       | 1     |
| PD2        | 43.47 ± 14.30                             | 2.18 ± 0.80         | 7.64 ± 1.97                             | 2.11 ± 0.57       | 4     |
| PD3        | 47.35 ± 13.38                             | 2.31 ± 0.66         | 8.72 ± 1.49                             | 2.40 ± 0.41       | 4     |

Four classes were identified according to the differences in glomerulus positioning and shape through four sets of data for each caste: (1) relatively consistent positioning and shape, (2) the shape is consistent but the positioning is inconsistent, (3) the positioning is consistent but the shape is inconsistent, (4) the shape and positioning are inconsistent.

**Table S8** Detailed information on the glomeruli of workers from *A. cerana*.

| Glomerulus | Volume( $10^3\mu\text{m}^3$ ) | RelativeVolume(%) | Area( $10^3\mu\text{m}^2$ ) | RelativeArea(%) | Class |
|------------|-------------------------------|-------------------|-----------------------------|-----------------|-------|
| AL1        | 20.50 $\pm$ 9.45              | 0.59 $\pm$ 0.20   | 4.03 $\pm$ 1.17             | 0.65 $\pm$ 0.14 | 3     |
| AL2        | 17.72 $\pm$ 6.86              | 0.54 $\pm$ 0.24   | 3.79 $\pm$ 1.05             | 0.63 $\pm$ 0.18 | 2     |
| AL3        | 19.05 $\pm$ 5.42              | 0.56 $\pm$ 0.13   | 3.95 $\pm$ 0.84             | 0.65 $\pm$ 0.12 | 1     |
| AL4        | 20.98 $\pm$ 6.21              | 0.63 $\pm$ 0.20   | 4.34 $\pm$ 0.73             | 0.72 $\pm$ 0.14 | 3     |
| AL5        | 62.91 $\pm$ 27.09             | 1.94 $\pm$ 0.94   | 9.30 $\pm$ 3.19             | 1.55 $\pm$ 0.58 | 2     |
| AL6        | 21.10 $\pm$ 3.92              | 0.64 $\pm$ 0.14   | 4.38 $\pm$ 0.42             | 0.72 $\pm$ 0.09 | 4     |
| AL7        | 20.47 $\pm$ 5.20              | 0.61 $\pm$ 0.13   | 4.32 $\pm$ 0.63             | 0.71 $\pm$ 0.08 | 1     |
| AL8        | 25.30 $\pm$ 6.44              | 0.77 $\pm$ 0.22   | 5.03 $\pm$ 0.71             | 0.83 $\pm$ 0.14 | 3     |
| AL9        | 25.14 $\pm$ 6.79              | 0.75 $\pm$ 0.20   | 4.92 $\pm$ 0.86             | 0.81 $\pm$ 0.15 | 2     |
| AL10       | 23.64 $\pm$ 5.61              | 0.72 $\pm$ 0.21   | 4.72 $\pm$ 0.83             | 0.78 $\pm$ 0.15 | 1     |
| AL11       | 40.29 $\pm$ 5.57              | 1.21 $\pm$ 0.17   | 6.63 $\pm$ 0.55             | 1.09 $\pm$ 0.11 | 1     |
| AL12       | 29.55 $\pm$ 10.73             | 0.87 $\pm$ 0.24   | 5.24 $\pm$ 1.18             | 0.85 $\pm$ 0.14 | 4     |
| AL13       | 39.70 $\pm$ 18.46             | 1.17 $\pm$ 0.51   | 6.70 $\pm$ 2.24             | 1.10 $\pm$ 0.36 | 2     |
| AL14       | 25.93 $\pm$ 10.71             | 0.76 $\pm$ 0.27   | 5.04 $\pm$ 1.48             | 0.82 $\pm$ 0.20 | 1     |
| AL15       | 23.05 $\pm$ 6.04              | 0.69 $\pm$ 0.19   | 4.65 $\pm$ 0.64             | 0.77 $\pm$ 0.12 | 4     |
| AL16       | 83.18 $\pm$ 15.27             | 2.48 $\pm$ 0.31   | 11.37 $\pm$ 1.33            | 1.87 $\pm$ 0.16 | 1     |
| AL17       | 26.75 $\pm$ 7.19              | 0.79 $\pm$ 0.17   | 4.98 $\pm$ 0.71             | 0.82 $\pm$ 0.09 | 3     |
| AL18       | 41.52 $\pm$ 6.61              | 1.24 $\pm$ 0.15   | 7.37 $\pm$ 0.93             | 1.21 $\pm$ 0.13 | 2     |
| AL19       | 29.64 $\pm$ 4.50              | 0.89 $\pm$ 0.12   | 5.68 $\pm$ 0.56             | 0.93 $\pm$ 0.07 | 3     |
| AL20       | 38.57 $\pm$ 7.85              | 1.16 $\pm$ 0.26   | 6.48 $\pm$ 0.95             | 1.07 $\pm$ 0.17 | 3     |
| AL21       | 35.15 $\pm$ 12.61             | 1.03 $\pm$ 0.31   | 6.24 $\pm$ 1.56             | 1.02 $\pm$ 0.21 | 4     |
| AL22       | 23.18 $\pm$ 4.83              | 0.69 $\pm$ 0.08   | 4.69 $\pm$ 0.51             | 0.77 $\pm$ 0.04 | 1     |
| AL23       | 39.73 $\pm$ 6.13              | 1.18 $\pm$ 0.08   | 6.58 $\pm$ 0.68             | 1.08 $\pm$ 0.05 | 2     |
| AL24       | 25.52 $\pm$ 2.81              | 0.75 $\pm$ 0.12   | 4.86 $\pm$ 0.42             | 0.79 $\pm$ 0.11 | 4     |
| AM1        | 16.14 $\pm$ 3.47              | 0.49 $\pm$ 0.12   | 3.60 $\pm$ 0.68             | 0.59 $\pm$ 0.11 | 2     |
| AM2        | 19.51 $\pm$ 6.54              | 0.58 $\pm$ 0.17   | 4.17 $\pm$ 0.81             | 0.68 $\pm$ 0.12 | 2     |
| AM3        | 29.84 $\pm$ 1.64              | 0.90 $\pm$ 0.06   | 5.59 $\pm$ 0.21             | 0.92 $\pm$ 0.05 | 1     |
| AM4        | 23.55 $\pm$ 2.44              | 0.71 $\pm$ 0.09   | 4.67 $\pm$ 0.42             | 0.77 $\pm$ 0.07 | 1     |
| AM5        | 23.27 $\pm$ 2.24              | 0.70 $\pm$ 0.09   | 4.74 $\pm$ 0.47             | 0.78 $\pm$ 0.07 | 1     |
| AM6        | 30.69 $\pm$ 16.01             | 0.88 $\pm$ 0.36   | 5.60 $\pm$ 1.70             | 0.91 $\pm$ 0.20 | 3     |
| AM7        | 14.46 $\pm$ 3.45              | 0.43 $\pm$ 0.09   | 3.45 $\pm$ 0.51             | 0.57 $\pm$ 0.07 | 1     |
| AM8        | 36.76 $\pm$ 9.35              | 1.09 $\pm$ 0.21   | 6.54 $\pm$ 1.25             | 1.07 $\pm$ 0.16 | 3     |
| AM9        | 38.68 $\pm$ 8.89              | 1.15 $\pm$ 0.23   | 6.31 $\pm$ 0.96             | 1.04 $\pm$ 0.15 | 3     |
| AM10       | 26.43 $\pm$ 9.22              | 0.81 $\pm$ 0.31   | 5.41 $\pm$ 1.04             | 0.90 $\pm$ 0.21 | 2     |
| AM11       | 27.65 $\pm$ 8.32              | 0.82 $\pm$ 0.24   | 5.37 $\pm$ 1.06             | 0.88 $\pm$ 0.15 | 2     |
| AM12       | 10.75 $\pm$ 2.79              | 0.33 $\pm$ 0.11   | 2.72 $\pm$ 0.56             | 0.45 $\pm$ 0.11 | 1     |
| AM13       | 22.67 $\pm$ 11.34             | 0.68 $\pm$ 0.35   | 4.59 $\pm$ 1.66             | 0.75 $\pm$ 0.28 | 2     |
| AM14       | 15.15 $\pm$ 4.18              | 0.47 $\pm$ 0.15   | 3.66 $\pm$ 0.52             | 0.61 $\pm$ 0.12 | 4     |
| AM15       | 57.42 $\pm$ 8.57              | 1.74 $\pm$ 0.35   | 10.12 $\pm$ 1.47            | 1.66 $\pm$ 0.18 | 1     |
| AM16       | 30.80 $\pm$ 20.81             | 0.93 $\pm$ 0.65   | 5.47 $\pm$ 1.99             | 0.91 $\pm$ 0.35 | 1     |
| AM17       | 28.45 $\pm$ 18.81             | 0.81 $\pm$ 0.48   | 5.22 $\pm$ 2.44             | 0.84 $\pm$ 0.35 | 2     |
| AM18       | 22.03 $\pm$ 5.49              | 0.65 $\pm$ 0.10   | 4.53 $\pm$ 0.68             | 0.74 $\pm$ 0.07 | 1     |

| Glomerulus | Volume( $10^3\mu\text{m}^3$ ) | RelativeVolume(%) | Area( $10^3\mu\text{m}^2$ ) | RelativeArea(%) | Class |
|------------|-------------------------------|-------------------|-----------------------------|-----------------|-------|
| AM19       | $19.76 \pm 2.13$              | $0.59 \pm 0.04$   | $4.40 \pm 0.20$             | $0.73 \pm 0.03$ | 2     |
| AV1        | $39.16 \pm 13.28$             | $1.18 \pm 0.42$   | $6.52 \pm 1.83$             | $1.07 \pm 0.30$ | 1     |
| AV2        | $47.26 \pm 10.72$             | $1.40 \pm 0.18$   | $7.35 \pm 0.86$             | $1.21 \pm 0.05$ | 1     |
| AV3        | $49.60 \pm 10.59$             | $1.48 \pm 0.25$   | $7.71 \pm 0.96$             | $1.27 \pm 0.13$ | 2     |
| MV1        | $28.38 \pm 2.26$              | $0.86 \pm 0.10$   | $5.03 \pm 0.29$             | $0.83 \pm 0.07$ | 1     |
| MV2        | $27.21 \pm 9.86$              | $0.81 \pm 0.28$   | $4.98 \pm 1.33$             | $0.82 \pm 0.21$ | 3     |
| MV3        | $21.04 \pm 5.39$              | $0.63 \pm 0.14$   | $4.40 \pm 0.58$             | $0.72 \pm 0.07$ | 2     |
| MV4        | $23.80 \pm 6.71$              | $0.71 \pm 0.19$   | $4.82 \pm 1.09$             | $0.79 \pm 0.16$ | 3     |
| P1         | $15.59 \pm 6.23$              | $0.47 \pm 0.21$   | $3.34 \pm 0.98$             | $0.55 \pm 0.17$ | 1     |
| P2         | $22.77 \pm 7.42$              | $0.69 \pm 0.25$   | $4.41 \pm 1.09$             | $0.73 \pm 0.19$ | 2     |
| P3         | $8.04 \pm 3.08$               | $0.25 \pm 0.10$   | $2.16 \pm 0.47$             | $0.36 \pm 0.09$ | 2     |
| P4         | $14.34 \pm 11.68$             | $0.45 \pm 0.38$   | $3.40 \pm 2.23$             | $0.57 \pm 0.38$ | 1     |
| P5         | $13.33 \pm 3.35$              | $0.41 \pm 0.13$   | $3.10 \pm 0.61$             | $0.52 \pm 0.12$ | 1     |
| P6         | $8.74 \pm 3.61$               | $0.26 \pm 0.11$   | $2.24 \pm 0.62$             | $0.37 \pm 0.11$ | 2     |
| P7         | $14.71 \pm 3.28$              | $0.48 \pm 0.11$   | $3.40 \pm 0.68$             | $0.59 \pm 0.13$ | 4     |
| P8         | $24.09 \pm 15.31$             | $0.77 \pm 0.48$   | $4.68 \pm 2.44$             | $0.79 \pm 0.40$ | 2     |
| P9         | $9.04 \pm 1.23$               | $0.29 \pm 0.04$   | $2.48 \pm 0.15$             | $0.43 \pm 0.03$ | 1     |
| PD1        | $66.69 \pm 20.29$             | $2.04 \pm 0.73$   | $9.88 \pm 2.25$             | $1.64 \pm 0.41$ | 1     |
| PD2        | $29.31 \pm 4.79$              | $0.88 \pm 0.21$   | $5.68 \pm 0.57$             | $0.94 \pm 0.16$ | 4     |
| PD3        | $21.43 \pm 3.15$              | $0.64 \pm 0.08$   | $4.45 \pm 0.29$             | $0.73 \pm 0.06$ | 1     |
| PD4        | $22.11 \pm 3.96$              | $0.66 \pm 0.11$   | $4.55 \pm 0.46$             | $0.75 \pm 0.08$ | 3     |
| PD5        | $31.27 \pm 6.62$              | $0.95 \pm 0.25$   | $5.80 \pm 1.14$             | $0.96 \pm 0.22$ | 3     |
| PD6        | $40.47 \pm 17.44$             | $1.23 \pm 0.56$   | $6.89 \pm 1.63$             | $1.14 \pm 0.30$ | 4     |
| PD7        | $35.27 \pm 14.93$             | $1.05 \pm 0.43$   | $6.24 \pm 1.91$             | $1.02 \pm 0.29$ | 1     |
| PD8        | $14.15 \pm 1.08$              | $0.42 \pm 0.05$   | $3.38 \pm 0.23$             | $0.55 \pm 0.06$ | 2     |
| PL1        | $22.74 \pm 3.87$              | $0.69 \pm 0.13$   | $4.30 \pm 0.55$             | $0.71 \pm 0.11$ | 1     |
| PL2        | $22.43 \pm 7.86$              | $0.66 \pm 0.20$   | $4.29 \pm 1.07$             | $0.70 \pm 0.15$ | 1     |
| PL3        | $46.09 \pm 19.19$             | $1.35 \pm 0.42$   | $7.05 \pm 1.91$             | $1.15 \pm 0.24$ | 2     |
| PL4        | $31.16 \pm 3.56$              | $0.94 \pm 0.10$   | $6.15 \pm 0.66$             | $1.01 \pm 0.07$ | 4     |
| PL5        | $29.34 \pm 9.81$              | $0.86 \pm 0.22$   | $5.40 \pm 1.25$             | $0.88 \pm 0.15$ | 4     |
| PL6        | $58.99 \pm 6.49$              | $1.77 \pm 0.21$   | $8.95 \pm 0.54$             | $1.48 \pm 0.12$ | 1     |
| PL7        | $49.29 \pm 6.27$              | $1.49 \pm 0.24$   | $7.56 \pm 0.68$             | $1.25 \pm 0.14$ | 3     |
| PL8        | $36.35 \pm 4.13$              | $1.10 \pm 0.16$   | $6.56 \pm 1.02$             | $1.08 \pm 0.16$ | 1     |
| PL9        | $26.57 \pm 3.73$              | $0.79 \pm 0.04$   | $5.07 \pm 0.45$             | $0.83 \pm 0.04$ | 1     |
| PL10       | $27.70 \pm 17.11$             | $0.83 \pm 0.54$   | $4.92 \pm 2.26$             | $0.80 \pm 0.36$ | 4     |
| PL11       | $23.89 \pm 13.16$             | $0.69 \pm 0.35$   | $4.55 \pm 1.75$             | $0.74 \pm 0.26$ | 4     |
| PL12       | $29.54 \pm 17.66$             | $0.85 \pm 0.44$   | $5.13 \pm 2.16$             | $0.83 \pm 0.30$ | 4     |
| PL13       | $25.00 \pm 3.31$              | $0.74 \pm 0.16$   | $4.85 \pm 0.44$             | $0.79 \pm 0.10$ | 4     |
| PL14       | $22.21 \pm 3.99$              | $0.64 \pm 0.17$   | $4.25 \pm 0.50$             | $0.68 \pm 0.13$ | 2     |
| PL15       | $33.73 \pm 7.20$              | $0.97 \pm 0.29$   | $6.05 \pm 0.77$             | $0.97 \pm 0.19$ | 2     |
| PL16       | $32.02 \pm 2.87$              | $0.89 \pm 0.01$   | $5.82 \pm 0.28$             | $0.92 \pm 0.03$ | 1     |
| PL17       | $34.55 \pm 8.56$              | $0.99 \pm 0.33$   | $5.96 \pm 1.02$             | $0.96 \pm 0.23$ | 1     |
| PM1        | $21.86 \pm 8.41$              | $0.64 \pm 0.19$   | $4.18 \pm 1.01$             | $0.68 \pm 0.13$ | 1     |

| Glomerulus | Volume( $10^3\mu\text{m}^3$ ) | RelativeVolume(%) | Area( $10^3\mu\text{m}^2$ ) | RelativeArea(%) | Class |
|------------|-------------------------------|-------------------|-----------------------------|-----------------|-------|
| PM2        | $37.63 \pm 4.81$              | $1.14 \pm 0.18$   | $6.56 \pm 0.83$             | $1.09 \pm 0.16$ | 1     |
| PM3        | $18.99 \pm 6.11$              | $0.56 \pm 0.13$   | $4.15 \pm 0.96$             | $0.68 \pm 0.13$ | 4     |
| PM4        | $16.53 \pm 7.40$              | $0.48 \pm 0.18$   | $3.68 \pm 0.99$             | $0.60 \pm 0.13$ | 3     |
| PM5        | $32.84 \pm 6.97$              | $0.98 \pm 0.14$   | $5.94 \pm 0.75$             | $0.97 \pm 0.06$ | 3     |
| PM6        | $25.04 \pm 7.57$              | $0.76 \pm 0.30$   | $4.67 \pm 0.89$             | $0.77 \pm 0.19$ | 2     |
| PM7        | $39.54 \pm 8.05$              | $1.19 \pm 0.26$   | $6.44 \pm 1.01$             | $1.06 \pm 0.18$ | 1     |
| PM8        | $14.95 \pm 6.82$              | $0.43 \pm 0.15$   | $3.39 \pm 1.03$             | $0.55 \pm 0.14$ | 1     |
| PM9        | $32.66 \pm 29.44$             | $0.91 \pm 0.71$   | $5.19 \pm 2.83$             | $0.83 \pm 0.38$ | 3     |
| PM10       | $18.09 \pm 0.06$              | $0.58 \pm 0.02$   | $3.85 \pm 0.03$             | $0.67 \pm 0.01$ | 4     |
| PM11       | $10.57 \pm 1.67$              | $0.31 \pm 0.09$   | $2.62 \pm 0.18$             | $0.43 \pm 0.07$ | 1     |
| PM12       | $27.78 \pm 8.19$              | $0.82 \pm 0.19$   | $5.07 \pm 1.01$             | $0.83 \pm 0.13$ | 1     |
| PM13       | $24.02 \pm 8.17$              | $0.70 \pm 0.16$   | $5.20 \pm 1.32$             | $0.85 \pm 0.15$ | 1     |
| PM14       | $27.77 \pm 23.00$             | $0.76 \pm 0.55$   | $5.23 \pm 2.79$             | $0.83 \pm 0.37$ | 3     |
| PM15       | $17.61 \pm 8.59$              | $0.51 \pm 0.20$   | $3.68 \pm 1.17$             | $0.60 \pm 0.16$ | 3     |
| PM16       | $17.65 \pm 2.90$              | $0.53 \pm 0.09$   | $3.78 \pm 0.32$             | $0.62 \pm 0.06$ | 1     |
| PM17       | $24.40 \pm 4.51$              | $0.75 \pm 0.21$   | $5.01 \pm 0.52$             | $0.82 \pm 0.14$ | 4     |
| PM18       | $22.82 \pm 17.65$             | $0.64 \pm 0.42$   | $4.42 \pm 2.42$             | $0.71 \pm 0.33$ | 3     |
| PM19       | $32.67 \pm 1.40$              | $1.04 \pm 0.01$   | $5.96 \pm 0.35$             | $1.03 \pm 0.05$ | 1     |
| PM20       | $9.51 \pm 0.61$               | $0.31 \pm 0.01$   | $2.52 \pm 0.15$             | $0.43 \pm 0.02$ | 2     |
| PM21       | $27.85 \pm 11.14$             | $0.77 \pm 0.22$   | $5.09 \pm 1.47$             | $0.80 \pm 0.17$ | 2     |
| PM22       | $23.11 \pm 7.13$              | $0.71 \pm 0.27$   | $4.67 \pm 0.81$             | $0.78 \pm 0.17$ | 4     |
| PM23       | $29.04 \pm 3.40$              | $0.93 \pm 0.13$   | $5.67 \pm 0.35$             | $0.97 \pm 0.07$ | 4     |
| PM24       | $17.20 \pm 5.64$              | $0.55 \pm 0.17$   | $3.70 \pm 0.84$             | $0.63 \pm 0.13$ | 1     |
| PM25       | $19.25 \pm 11.87$             | $0.60 \pm 0.39$   | $3.87 \pm 1.64$             | $0.64 \pm 0.29$ | 2     |
| PM26       | $20.65 \pm 8.21$              | $0.63 \pm 0.28$   | $4.22 \pm 1.40$             | $0.69 \pm 0.25$ | 2     |
| PV1        | $58.93 \pm 14.28$             | $1.88 \pm 0.48$   | $8.23 \pm 1.29$             | $1.41 \pm 0.21$ | 1     |
| PV2        | $23.45 \pm 11.80$             | $0.70 \pm 0.36$   | $4.38 \pm 1.61$             | $0.72 \pm 0.28$ | 1     |
| PV3        | $17.51 \pm 2.56$              | $0.53 \pm 0.11$   | $3.81 \pm 0.42$             | $0.63 \pm 0.09$ | 3     |
| PV4        | $15.28 \pm 4.44$              | $0.45 \pm 0.09$   | $3.63 \pm 0.78$             | $0.59 \pm 0.09$ | 1     |
| VC1        | $24.10 \pm 3.62$              | $0.72 \pm 0.07$   | $4.36 \pm 0.40$             | $0.72 \pm 0.03$ | 1     |
| VC2        | $35.91 \pm 5.45$              | $1.08 \pm 0.13$   | $5.79 \pm 0.50$             | $0.95 \pm 0.06$ | 2     |
| VC3        | $51.30 \pm 13.87$             | $1.54 \pm 0.41$   | $7.46 \pm 1.49$             | $1.22 \pm 0.22$ | 1     |
| VC4        | $42.04 \pm 11.06$             | $1.26 \pm 0.33$   | $6.59 \pm 1.20$             | $1.09 \pm 0.20$ | 1     |
| VC5        | $33.17 \pm 9.26$              | $0.98 \pm 0.22$   | $5.42 \pm 0.98$             | $0.89 \pm 0.12$ | 3     |
| VC6        | $25.00 \pm 2.43$              | $0.75 \pm 0.03$   | $4.59 \pm 0.36$             | $0.75 \pm 0.02$ | 1     |
| VC7        | $27.50 \pm 3.29$              | $0.83 \pm 0.09$   | $4.87 \pm 0.42$             | $0.80 \pm 0.06$ | 2     |
| VC8        | $17.39 \pm 3.74$              | $0.52 \pm 0.09$   | $3.56 \pm 0.52$             | $0.58 \pm 0.07$ | 1     |
| VC9        | $36.61 \pm 10.38$             | $1.06 \pm 0.18$   | $5.87 \pm 1.11$             | $0.95 \pm 0.11$ | 2     |
| VC10       | $45.15 \pm 6.37$              | $1.38 \pm 0.30$   | $7.01 \pm 0.67$             | $1.17 \pm 0.18$ | 2     |
| VC11       | $38.98 \pm 6.17$              | $1.17 \pm 0.17$   | $6.24 \pm 0.76$             | $1.03 \pm 0.11$ | 1     |
| VC12       | $35.31 \pm 20.37$             | $1.06 \pm 0.63$   | $5.70 \pm 2.07$             | $0.94 \pm 0.37$ | 2     |

Four classes were identified according to the differences in glomerulus positioning and shape through four sets of data for each caste: (1) relatively consistent positioning and shape, (2) the shape is consistent but the

positioning is inconsistent, (3) the positioning is consistent but the shape is inconsistent, (4) the shape and positioning are inconsistent.

**Table S9** Primers for RT-qPCR of 33 candidate *AcerORs* DEGs in *A. cerana*.

| Gene              | Forward primer (5' to 3') | Reverse primer (5' to 3') |
|-------------------|---------------------------|---------------------------|
| <i>β-actin</i>    | GGCTCCCGAAGAACATCC        | TGCGAAACACCGTCACCC        |
| <i>AcerOR11</i>   | ATGTGCGGTTTGCTGAAGA       | CGAGAAGGTGCCAATGACG       |
| <i>AcerOR12</i>   | GGCTGCTCTTCTTGCGATAC      | CCACCTTCACTGTCTGTTCTG     |
| <i>AcerOR15a</i>  | TAGGATGCGTGATTGGATACTG    | AGTGACACCCGAATACAGATGC    |
| <i>AcerOR18</i>   | TACTGCACGGGATCAGAATG      | TTGAGAACAATCGGCACTTG      |
| <i>AcerOR22</i>   | AGGATGGAACAGTGAACATAGC    | GCGAAGCAACACTAGCAATTAC    |
| <i>AcerOR28b</i>  | TGATTCCTTGCTGCTTCAC       | CAATGATGAGTTCGCTGTTAGG    |
| <i>AcerOR54a</i>  | TTCAGGAGGAATGTCGTATCAC    | AGATTGCTGCCAAACTATATGC    |
| <i>AcerOR54b</i>  | TTGGCAGCAATCTTTGTTACAC    | TGGTGGATGTTGTGATATGGAG    |
| <i>AcerOR66a</i>  | GGCAGTGGCAAAGGTGATG       | CAGCAAGCATAGGCACAGTC      |
| <i>AcerOR74</i>   | ACGACGACGACGAGAAGATAC     | ATATGGTGTACGCTCAGAGG      |
| <i>AcerOR76</i>   | TGGAGGAACGACGAAGGAAC      | CGAAGAAGGTGAAGACGAAGAC    |
| <i>AcerOR79a</i>  | GTCCGACATCATCAGGCATTG     | ATGGAGCGTCTGGCAAGAG       |
| <i>AcerOR79b</i>  | CGACACGAAGCACGAGATAC      | GTAGCCACCAACACTTGATACC    |
| <i>AcerOR96a</i>  | TCACCCTCTCTTATCGCATCTC    | AGGCAACAGGCTCGTCTTG       |
| <i>AcerOR97</i>   | TGCGAAAGCGACAGAATGC       | CAATCACCTGCCCAGTAAGAG     |
| <i>AcerOR107b</i> | ATGCTCGTTGGTACTATGGTTC    | CAATCAATCCTCCTCCTGTCAG    |
| <i>AcerOR109a</i> | TGGAGAGTTAGTTGGTGTATGG    | CGCTGTTGTCTTCTTGAATAC     |
| <i>AcerOR113</i>  | TCATGGTGGTCGTCGTGTAC      | GCTCGTTCGTGTCCTTGAATAG    |
| <i>AcerOR121</i>  | TGATACGCCGAGCAAGAATTG     | CAAGCCATATACACAAGCACAC    |
| <i>AcerOR122</i>  | TGTGTATCAGGTGCGGATAATG    | GCCCAATCTCGTTCAATGTTTG    |
| <i>AcerOR141a</i> | TGGTCACGCACGATATACAATC    | GACAGTATCCACGCCAACAC      |
| <i>AcerOR142</i>  | TGGCAACAAATGGAACAACCTG    | CGCTGGCACTGAACACTAC       |
| <i>AcerOR149a</i> | GAAGCACAGCAATACGAAAGG     | GCAAATGTACTTACACCGATGG    |
| <i>AcerOR149b</i> | ATTGCCATTGTCTTTCA         | TCGTATTGCTGTGCTTC         |
| <i>AcerOR154b</i> | ACATTATTCGACTCAGCGTAGC    | AGGCAGGAACACCATGAAGG      |
| <i>AcerOR155</i>  | ATGTTTCATGCTGCTCCTTCC     | TTCGTATTGATTGCTTCCTTG     |
| <i>AcerOR159</i>  | ACTGTATCTGCTCCTCGTTGG     | TTCCGTCAATGTGCTCAAGTC     |
| <i>AcerOR160b</i> | ACACGACCTTGAGAAGACATTG    | CCTCCACCGACCGATACAG       |
| <i>AcerOR163a</i> | TCACGGCTGGAATGTTAATGG     | AATGAACGCTTCGCAATTTCG     |
| <i>AcerOR166b</i> | TGATAGCGTAAGCACTACTTTG    | AAGGCATCTAACACAGCAATAC    |
| <i>AcerOR168</i>  | ACCTGGCTTCCTGTATCCTC      | CCAAACCATAACCGAAGTAACG    |
| <i>AcerOR170</i>  | GCTAGTGTGCTTCGCTTATG      | TTATCGTATCTTCACCGCCAAG    |
| <i>AcerOR174</i>  | ATGATTTGTGTTGGTCTTTGGC    | TGGGCGAGTGTGATTTAAAGG     |

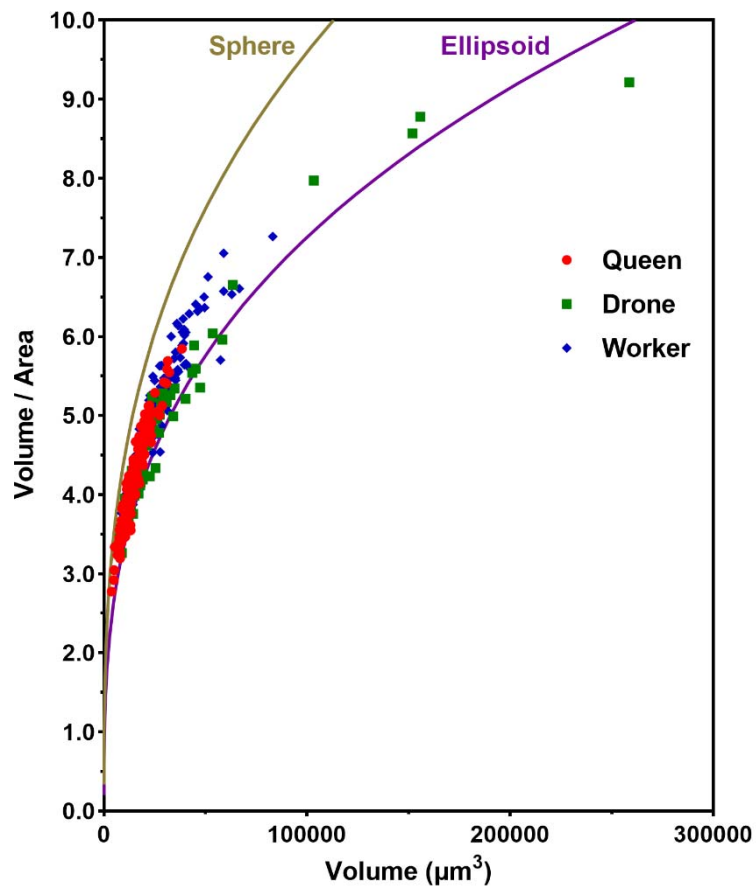

**Figure S1** Quantification method on the shape of glomeruli in *A. cerana*. X axis indicate the volume of each glomerulus, Y axis indicate the Volume / Area ratio of each glomerulus, the dots near the brown line are classified into a sphere shape, while the dots near the purple line are classified into an ellipsoid shape. This method is used to classify the shape of glomeruli in our studies.



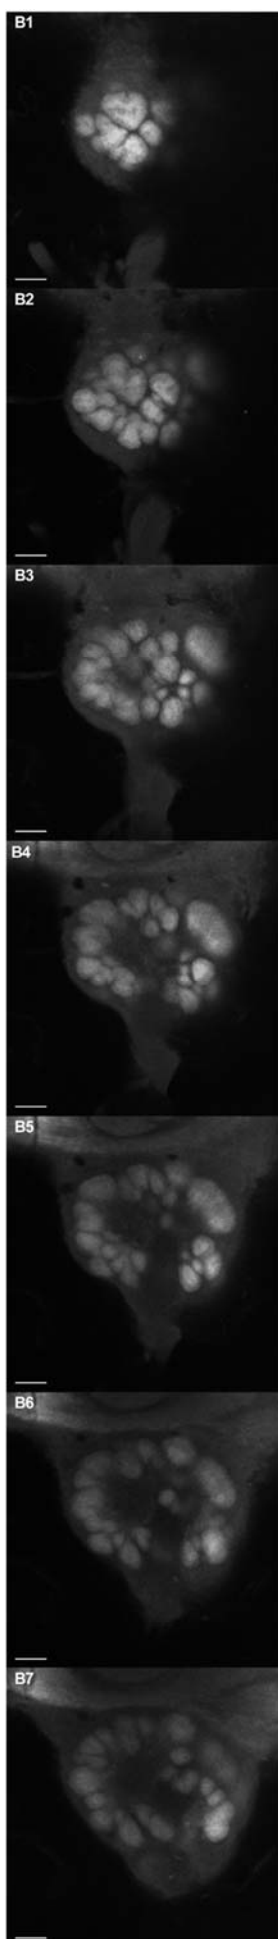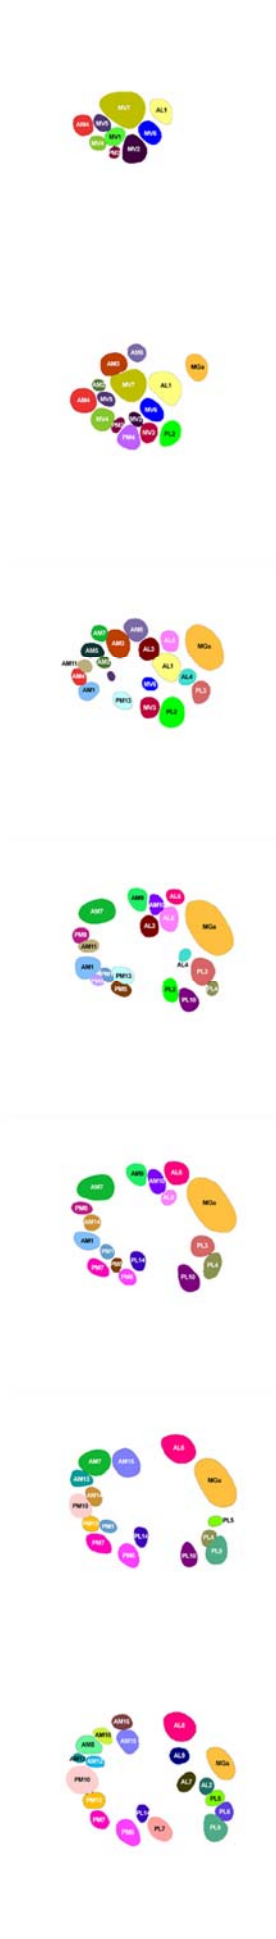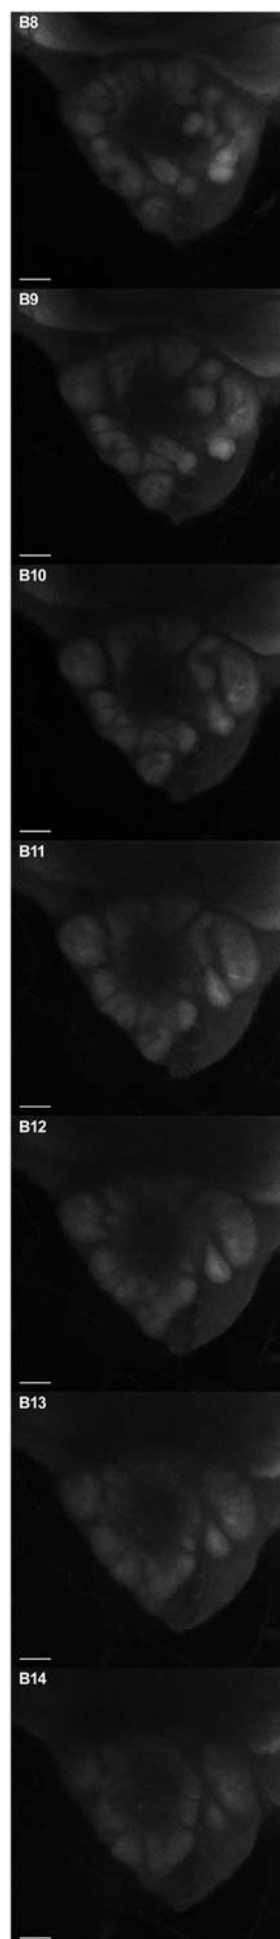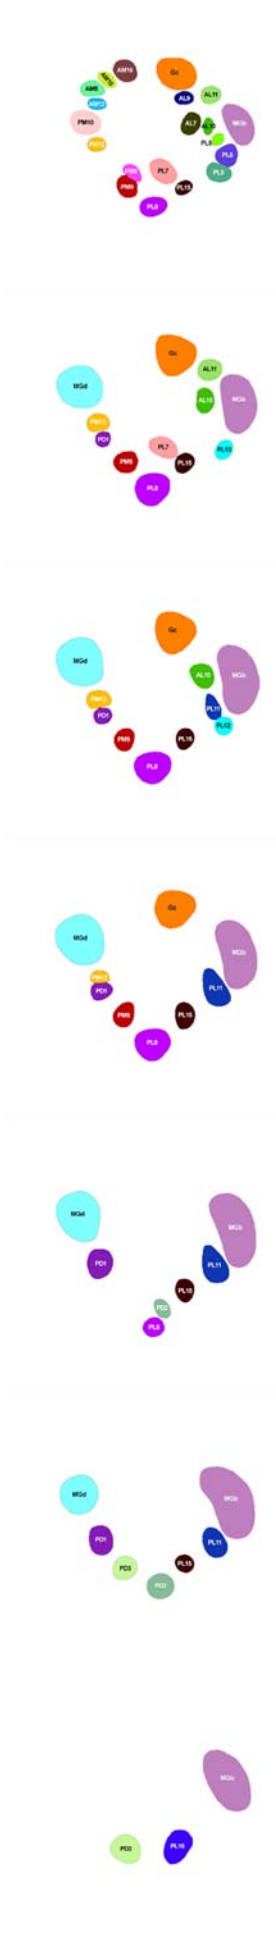

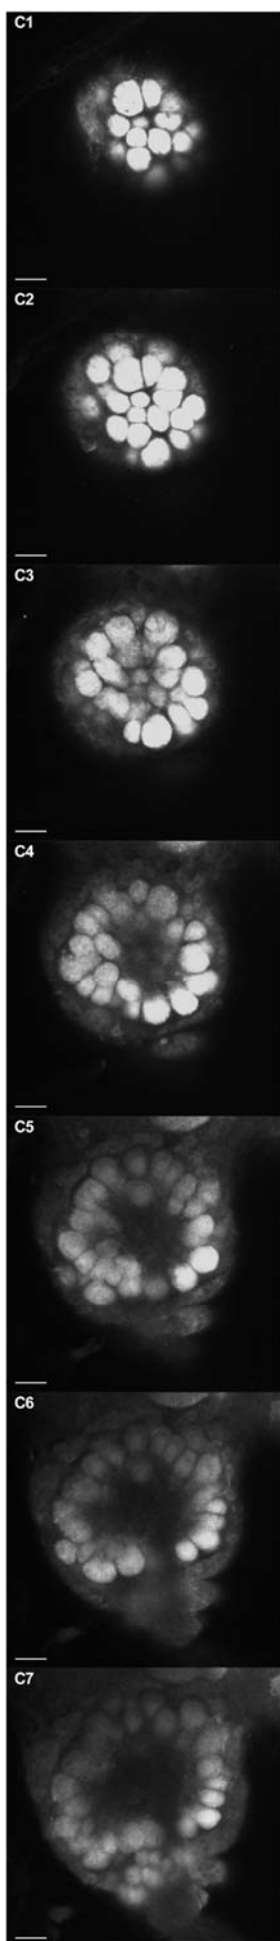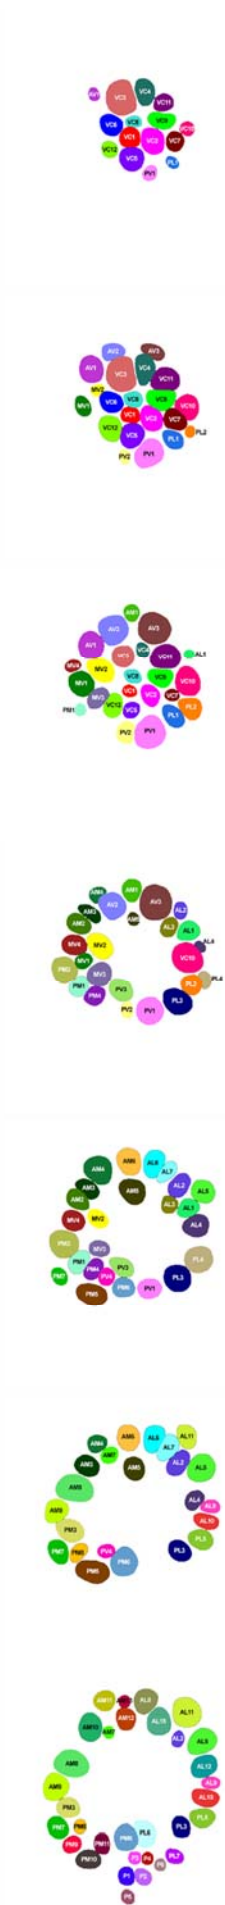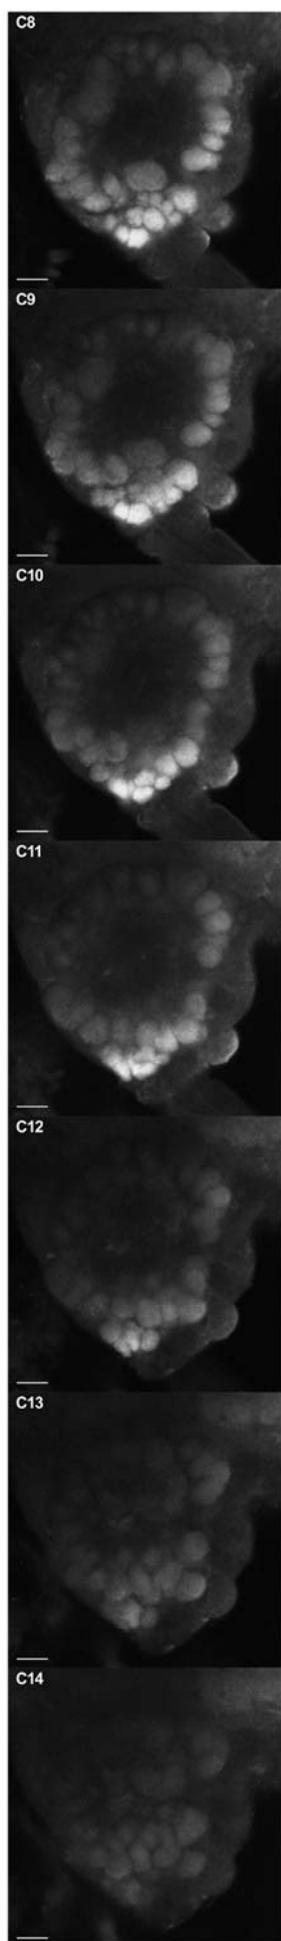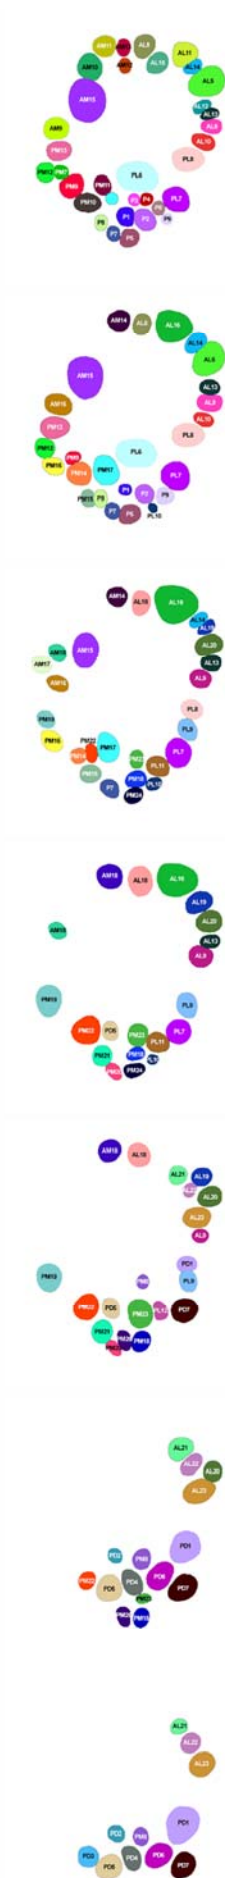

**Figure S2** Confocal image and modelling of ALs in *A. cerana*: (A1-A14) queen, (B1-B14) drone, (C1-C14) worker. The anti SYNORF1 was used and Cy2 was used as a secondary antibody. Fourteen image stacks were selected from each caste. The left side is the original confocal image and the right side is the glomerulus identified and manually segmented using Amira software. Scale bar = 50  $\mu\text{m}$ .
